# Supplementary material for: Integrated multiomics characterization reveals cuproptosis-related hub genes for predicting the prognosis and clinical efficacy of ovarian cancer
Source: PubMed Central journal article supplement (PMC11588705; doi:10.3389/fimmu.2024.1452294), 2024-11-12

**A**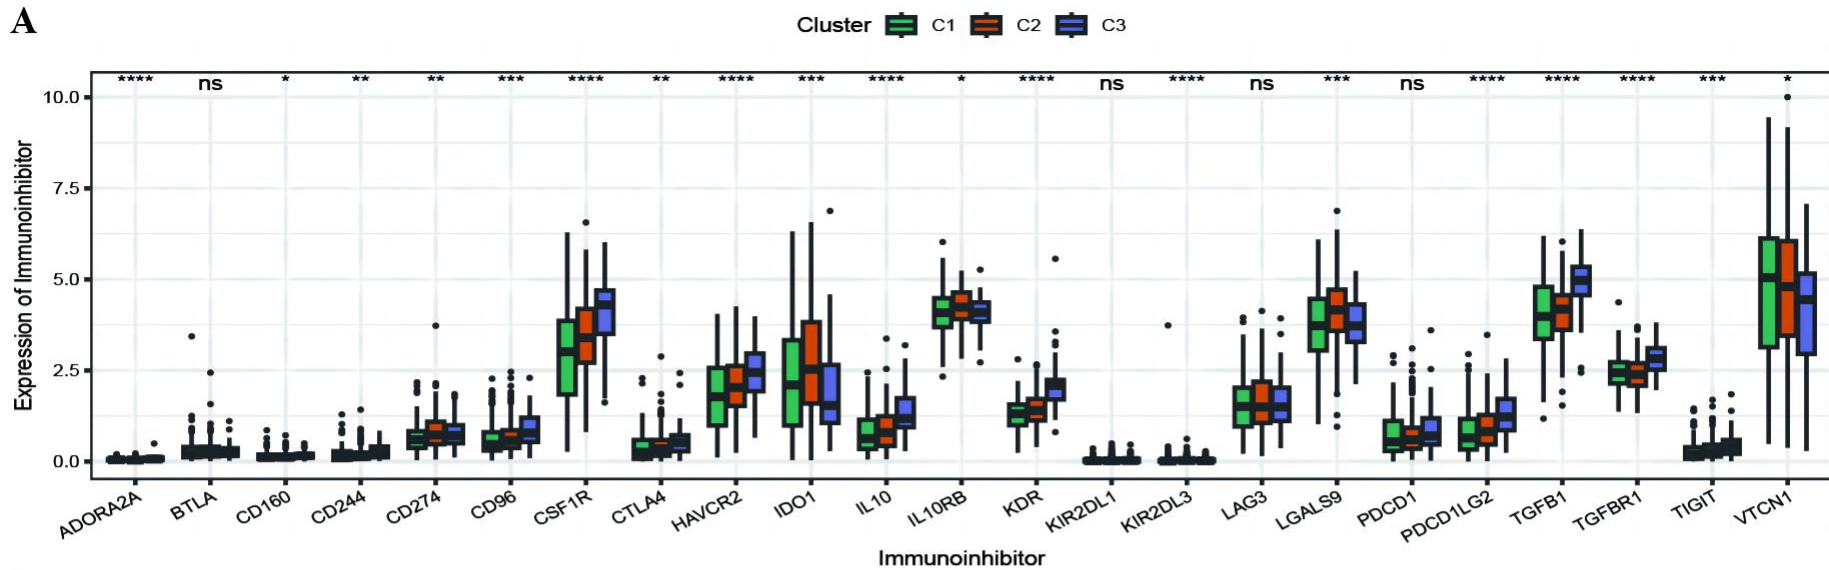**B**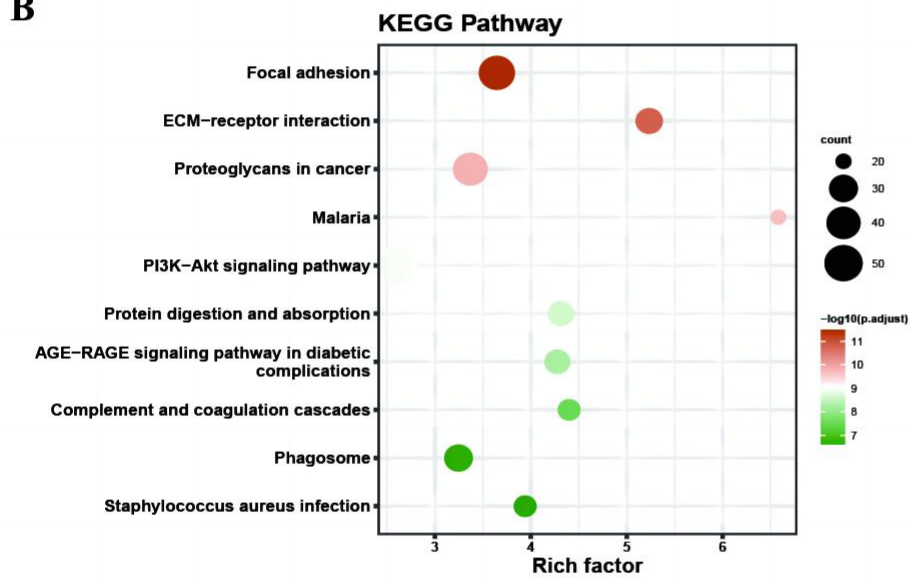**C**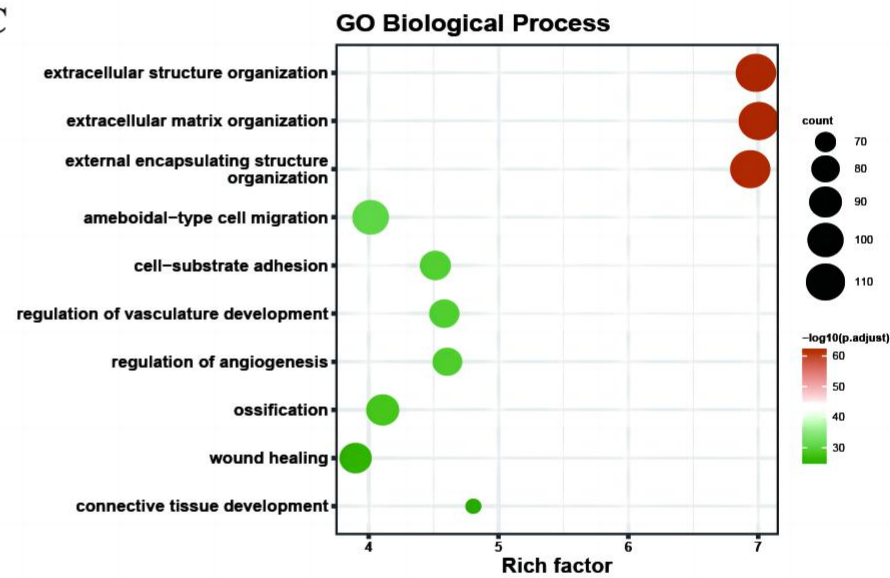**D**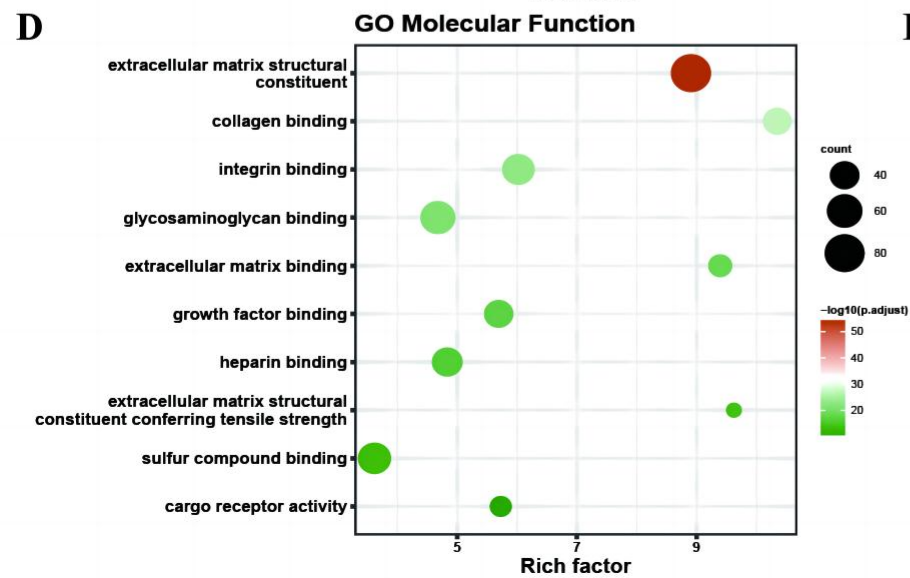**E**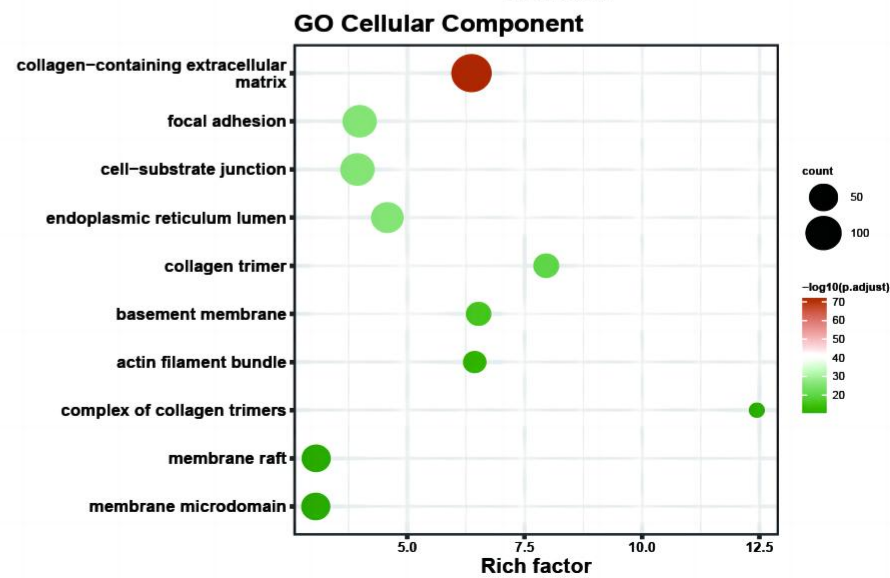

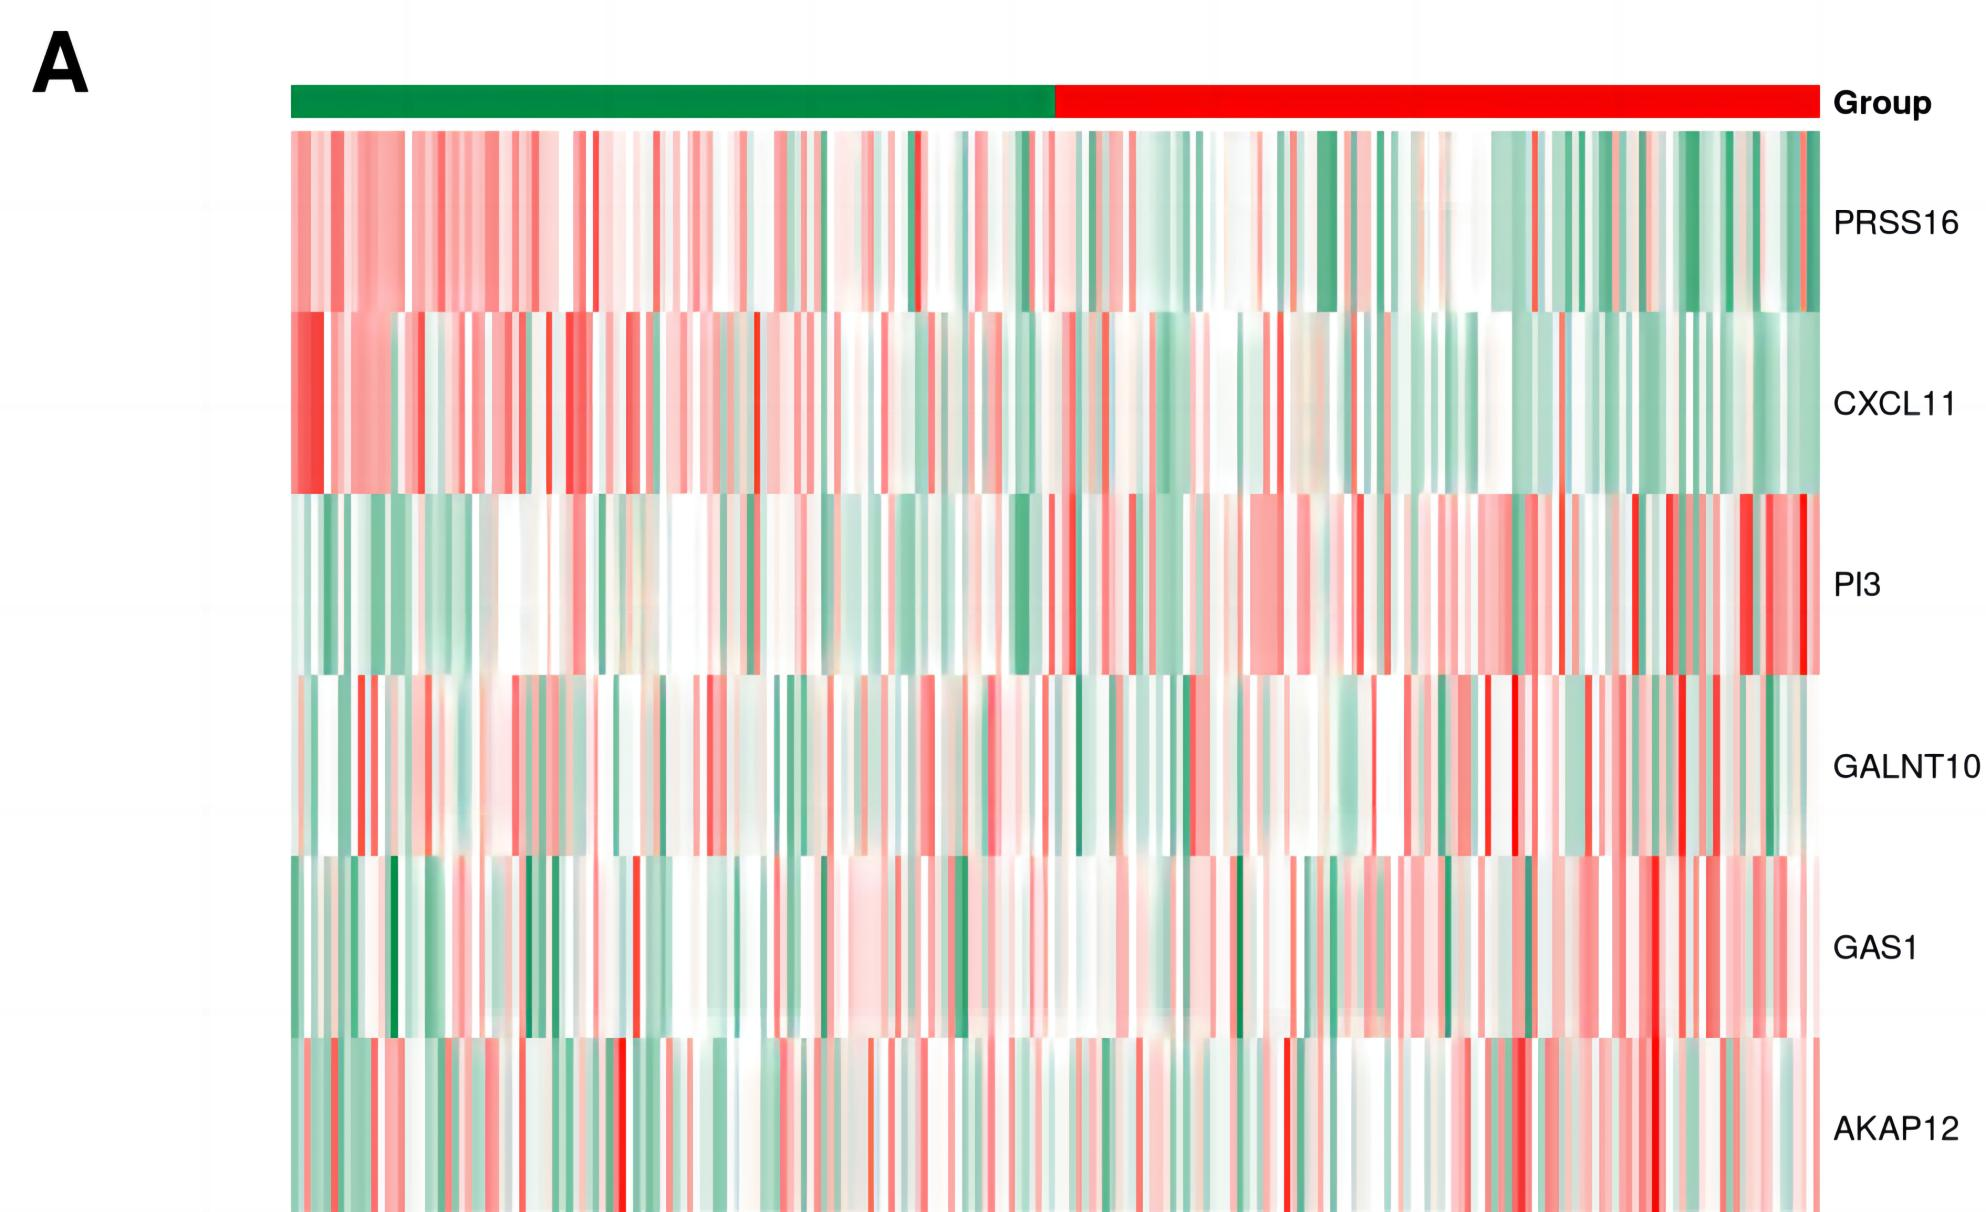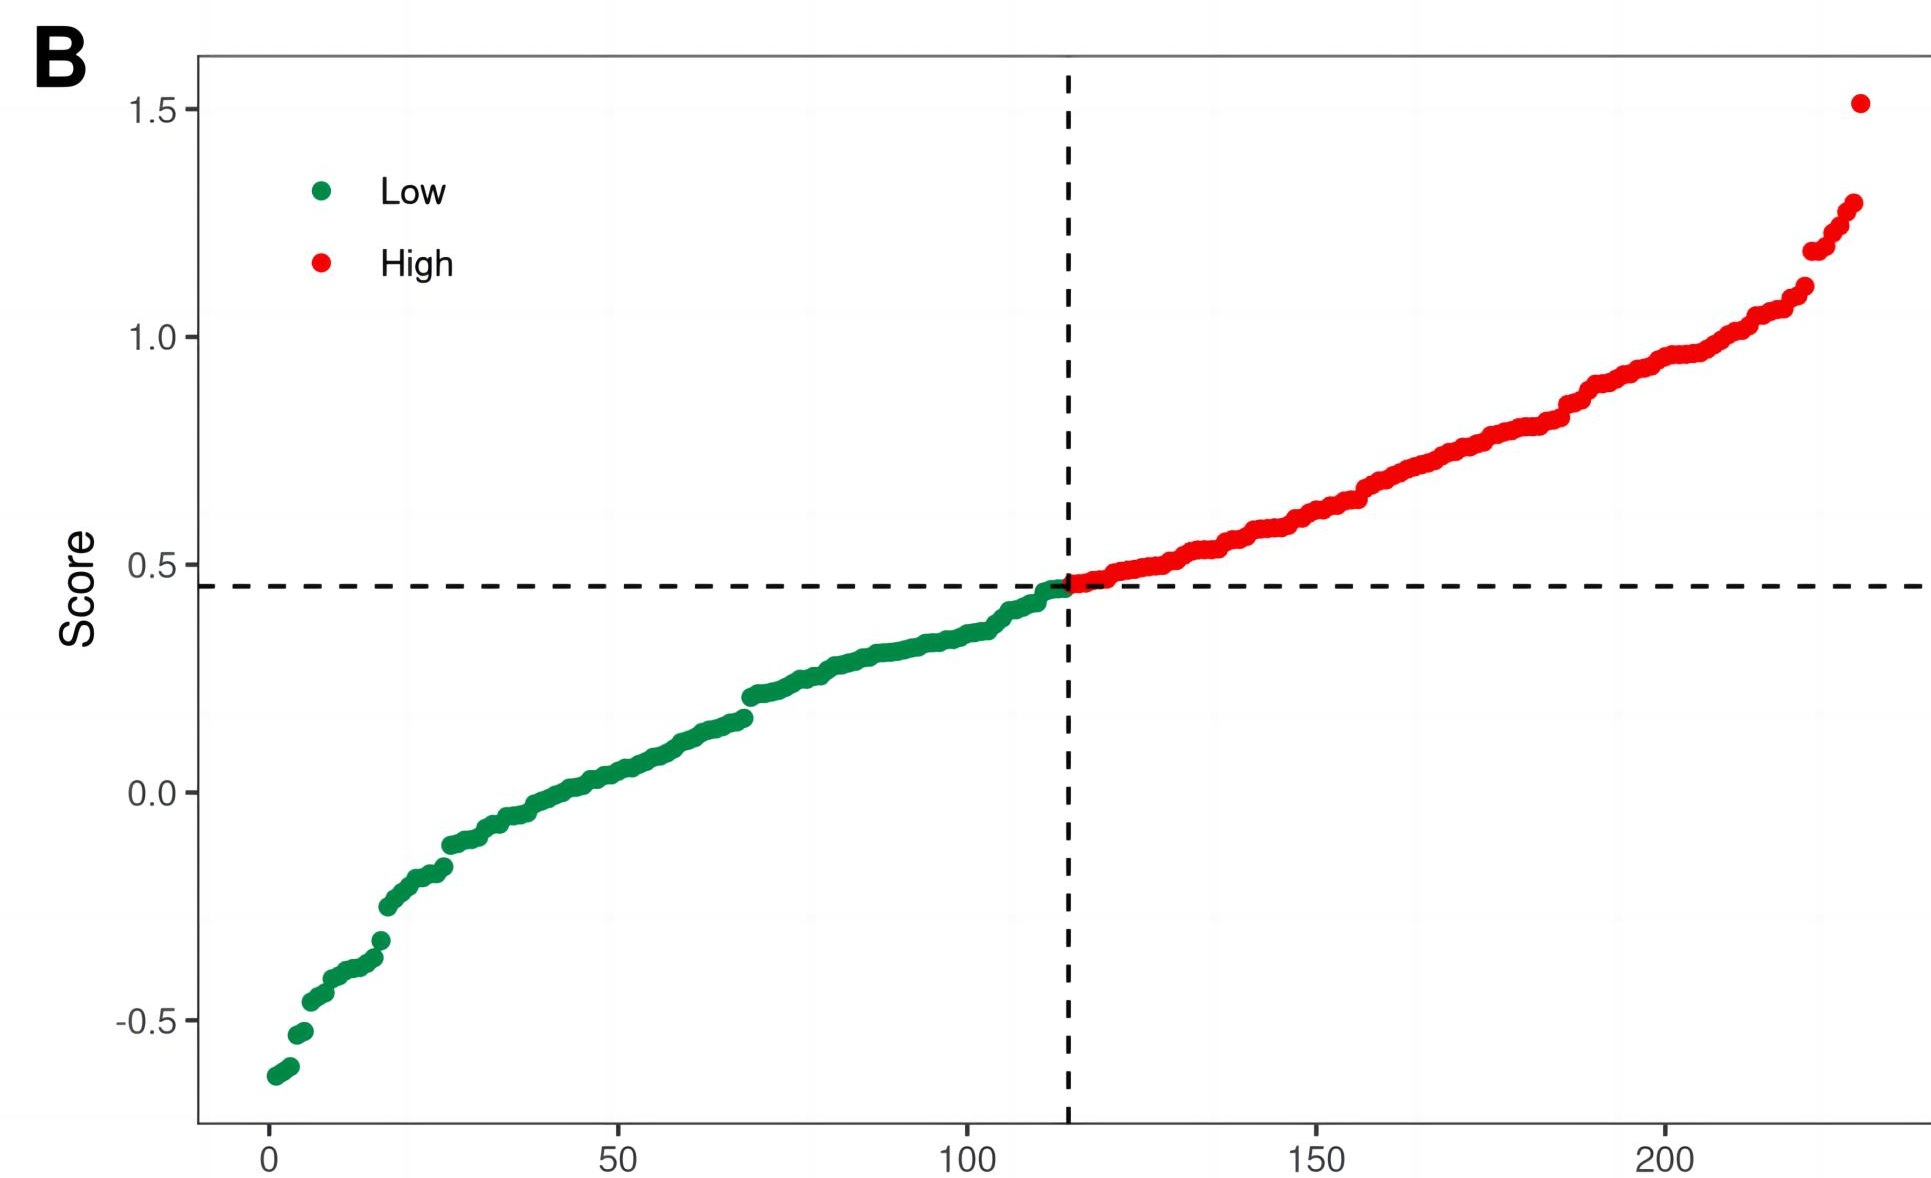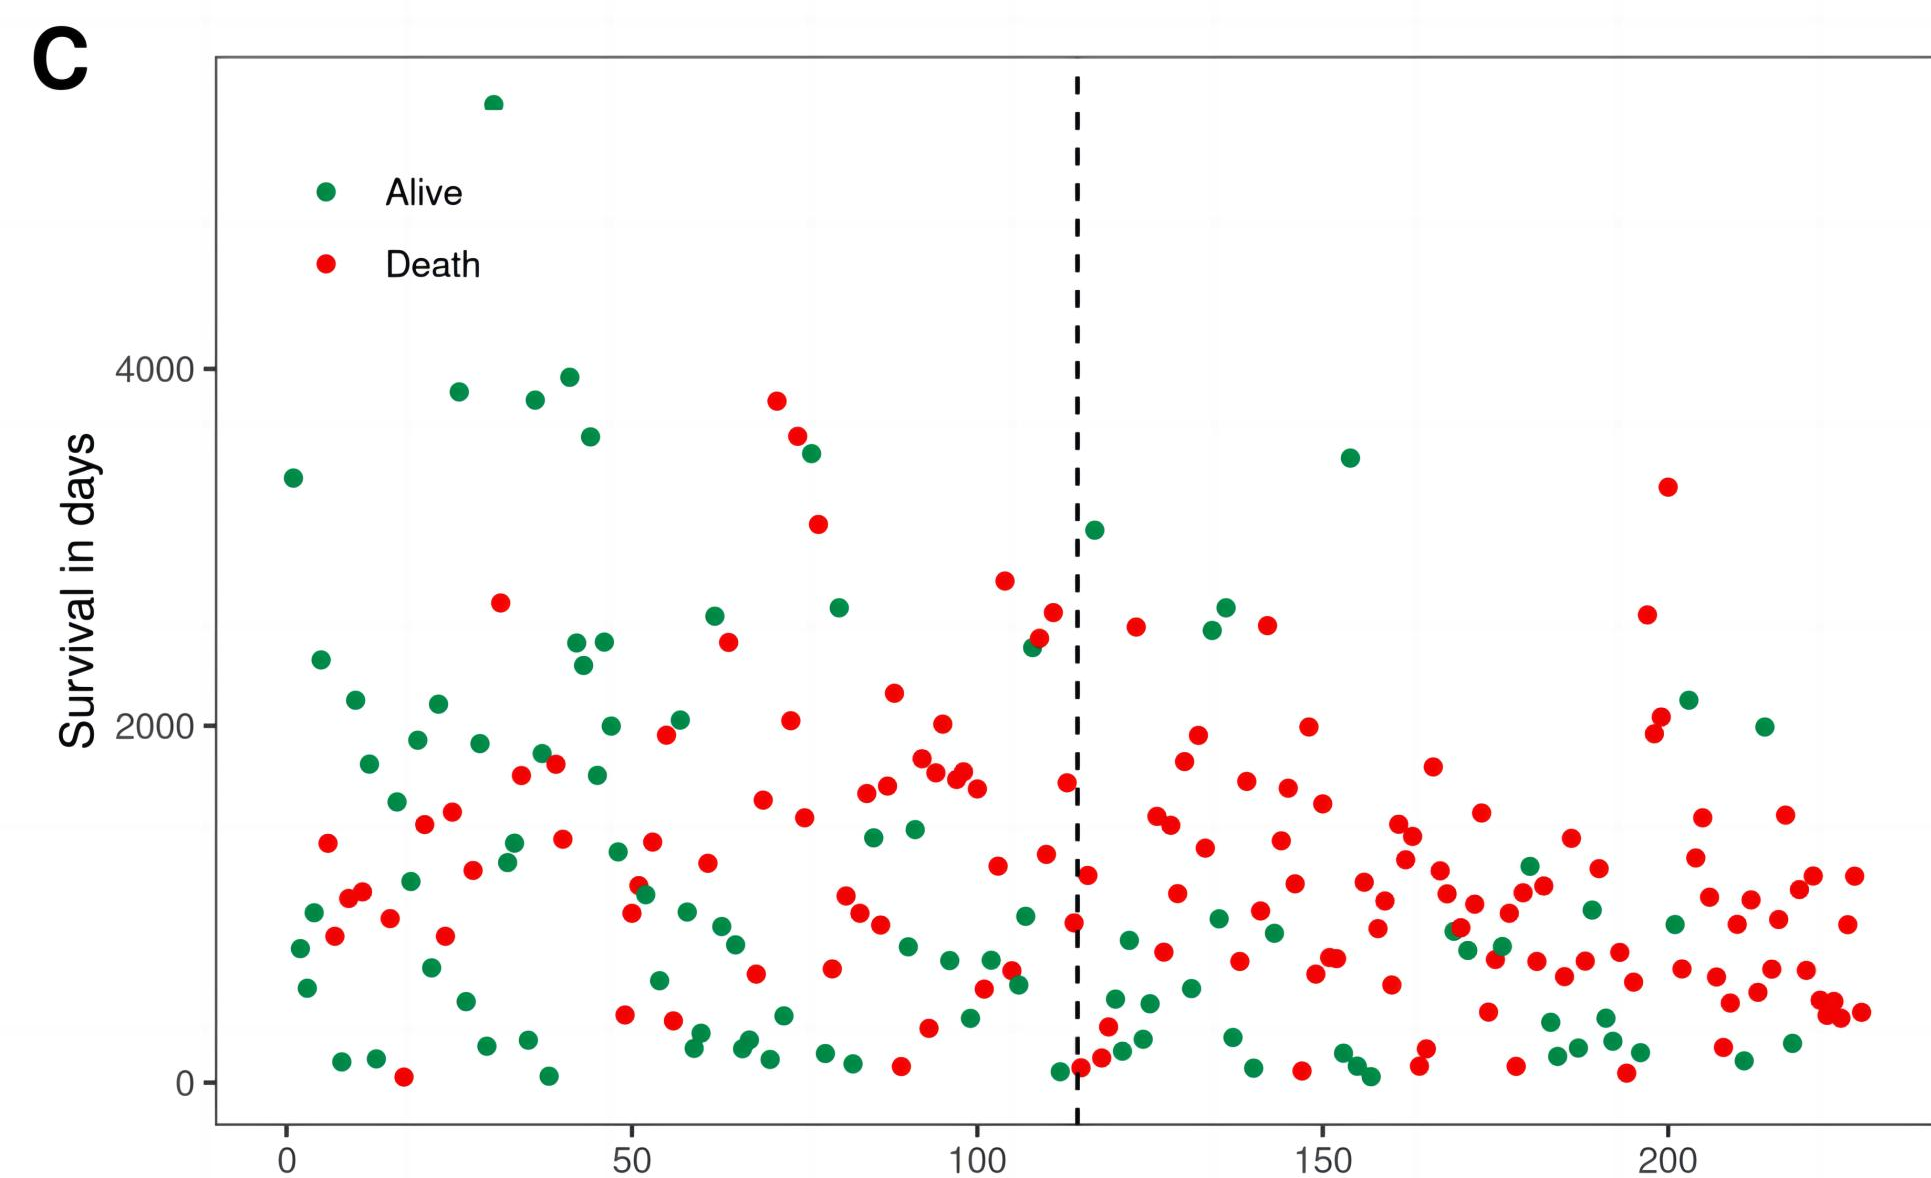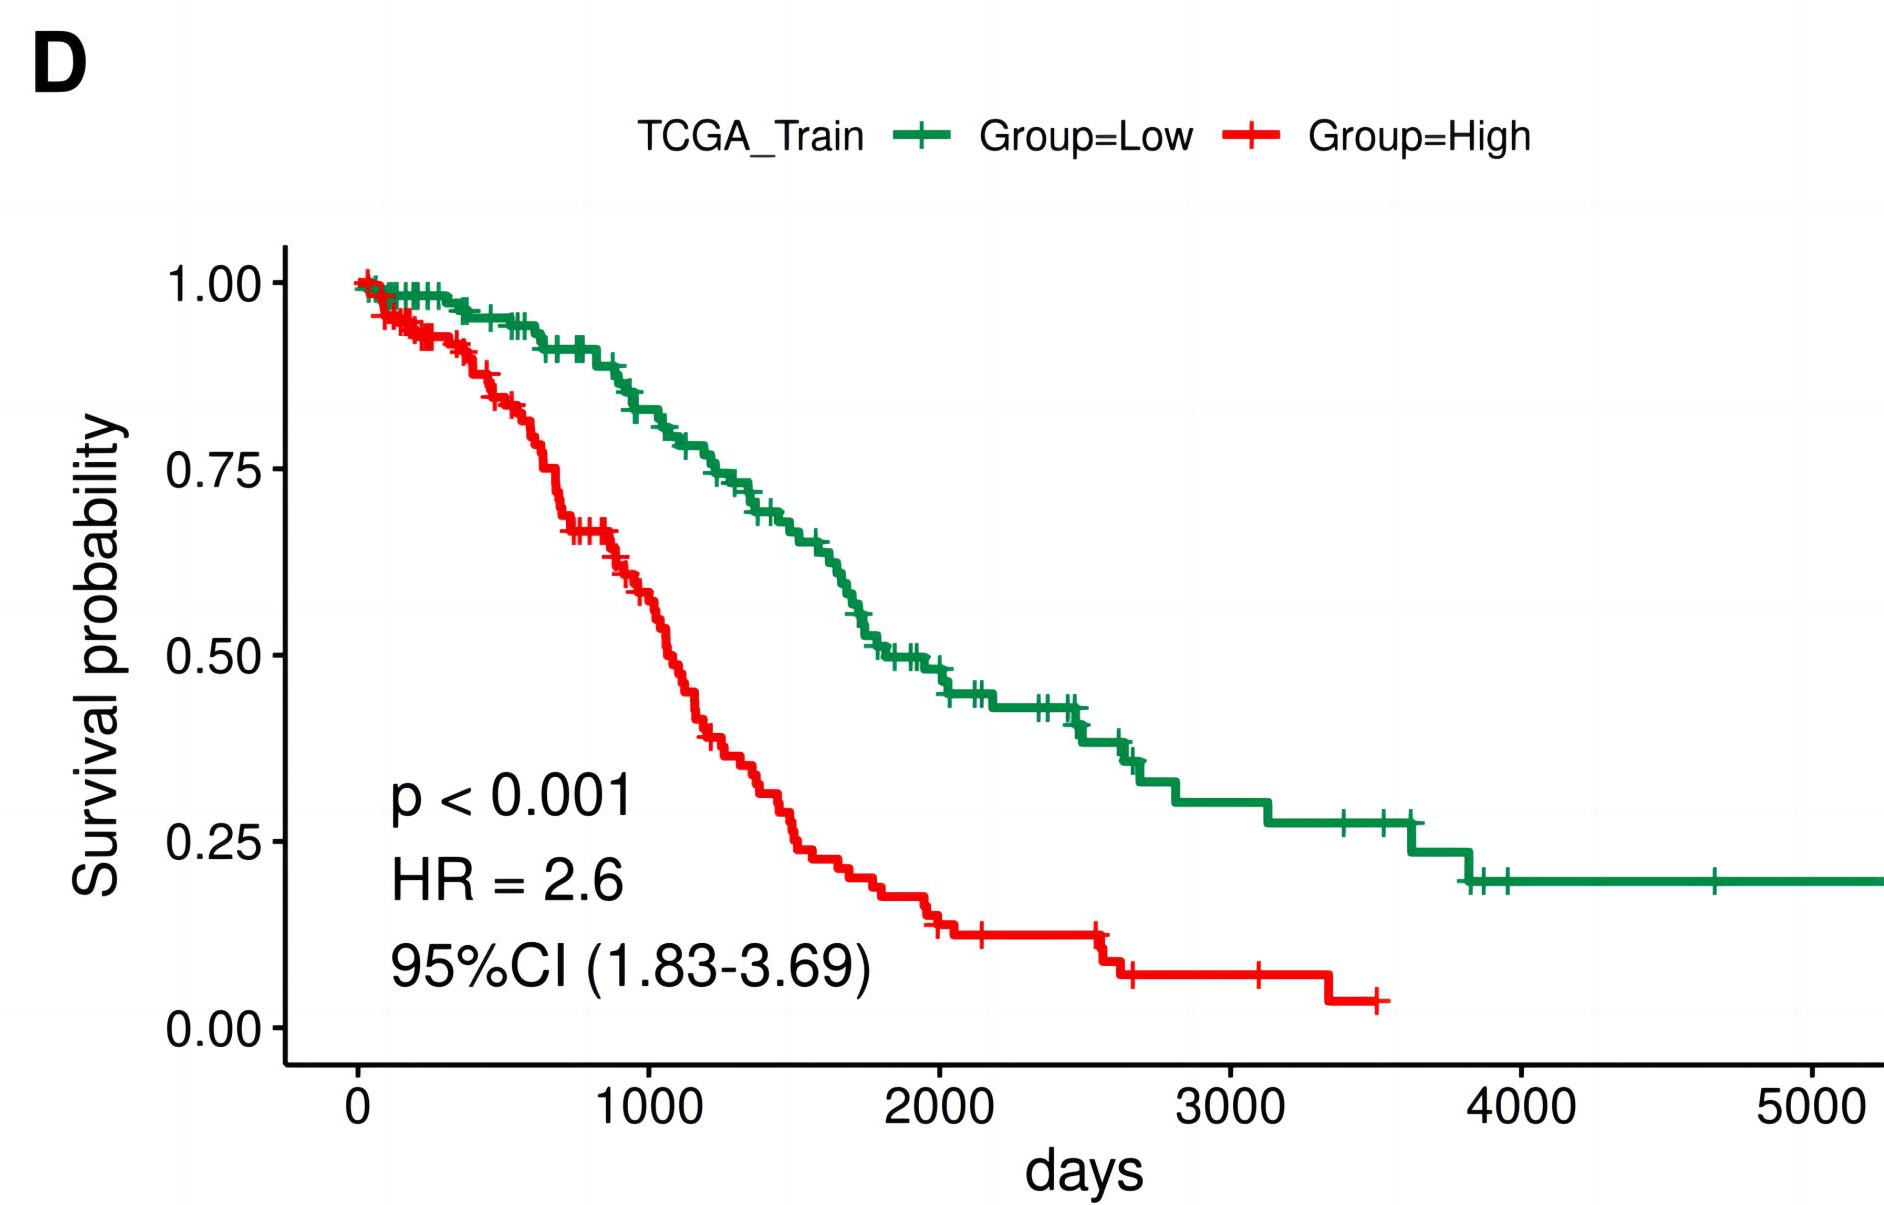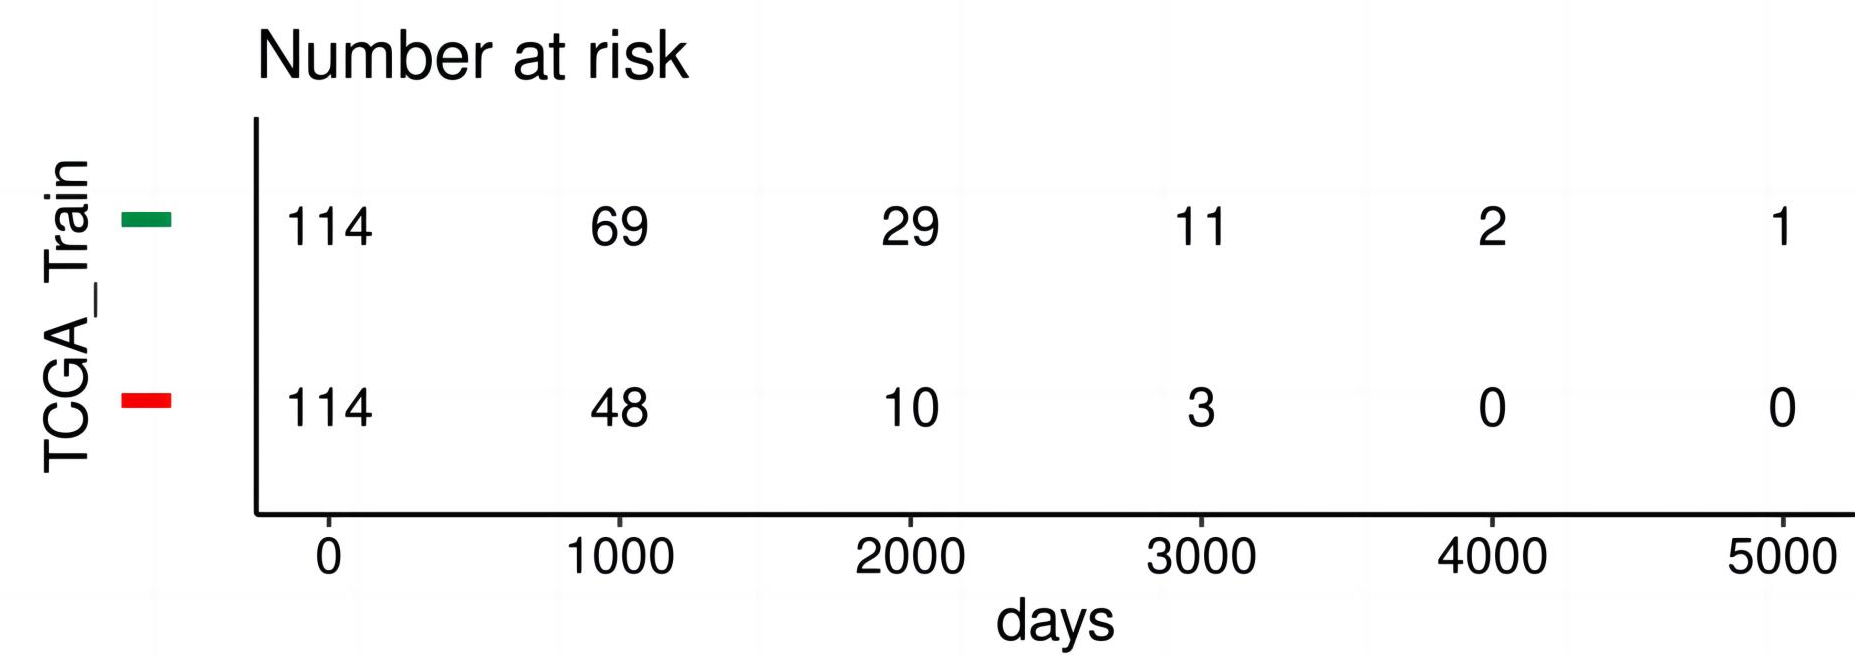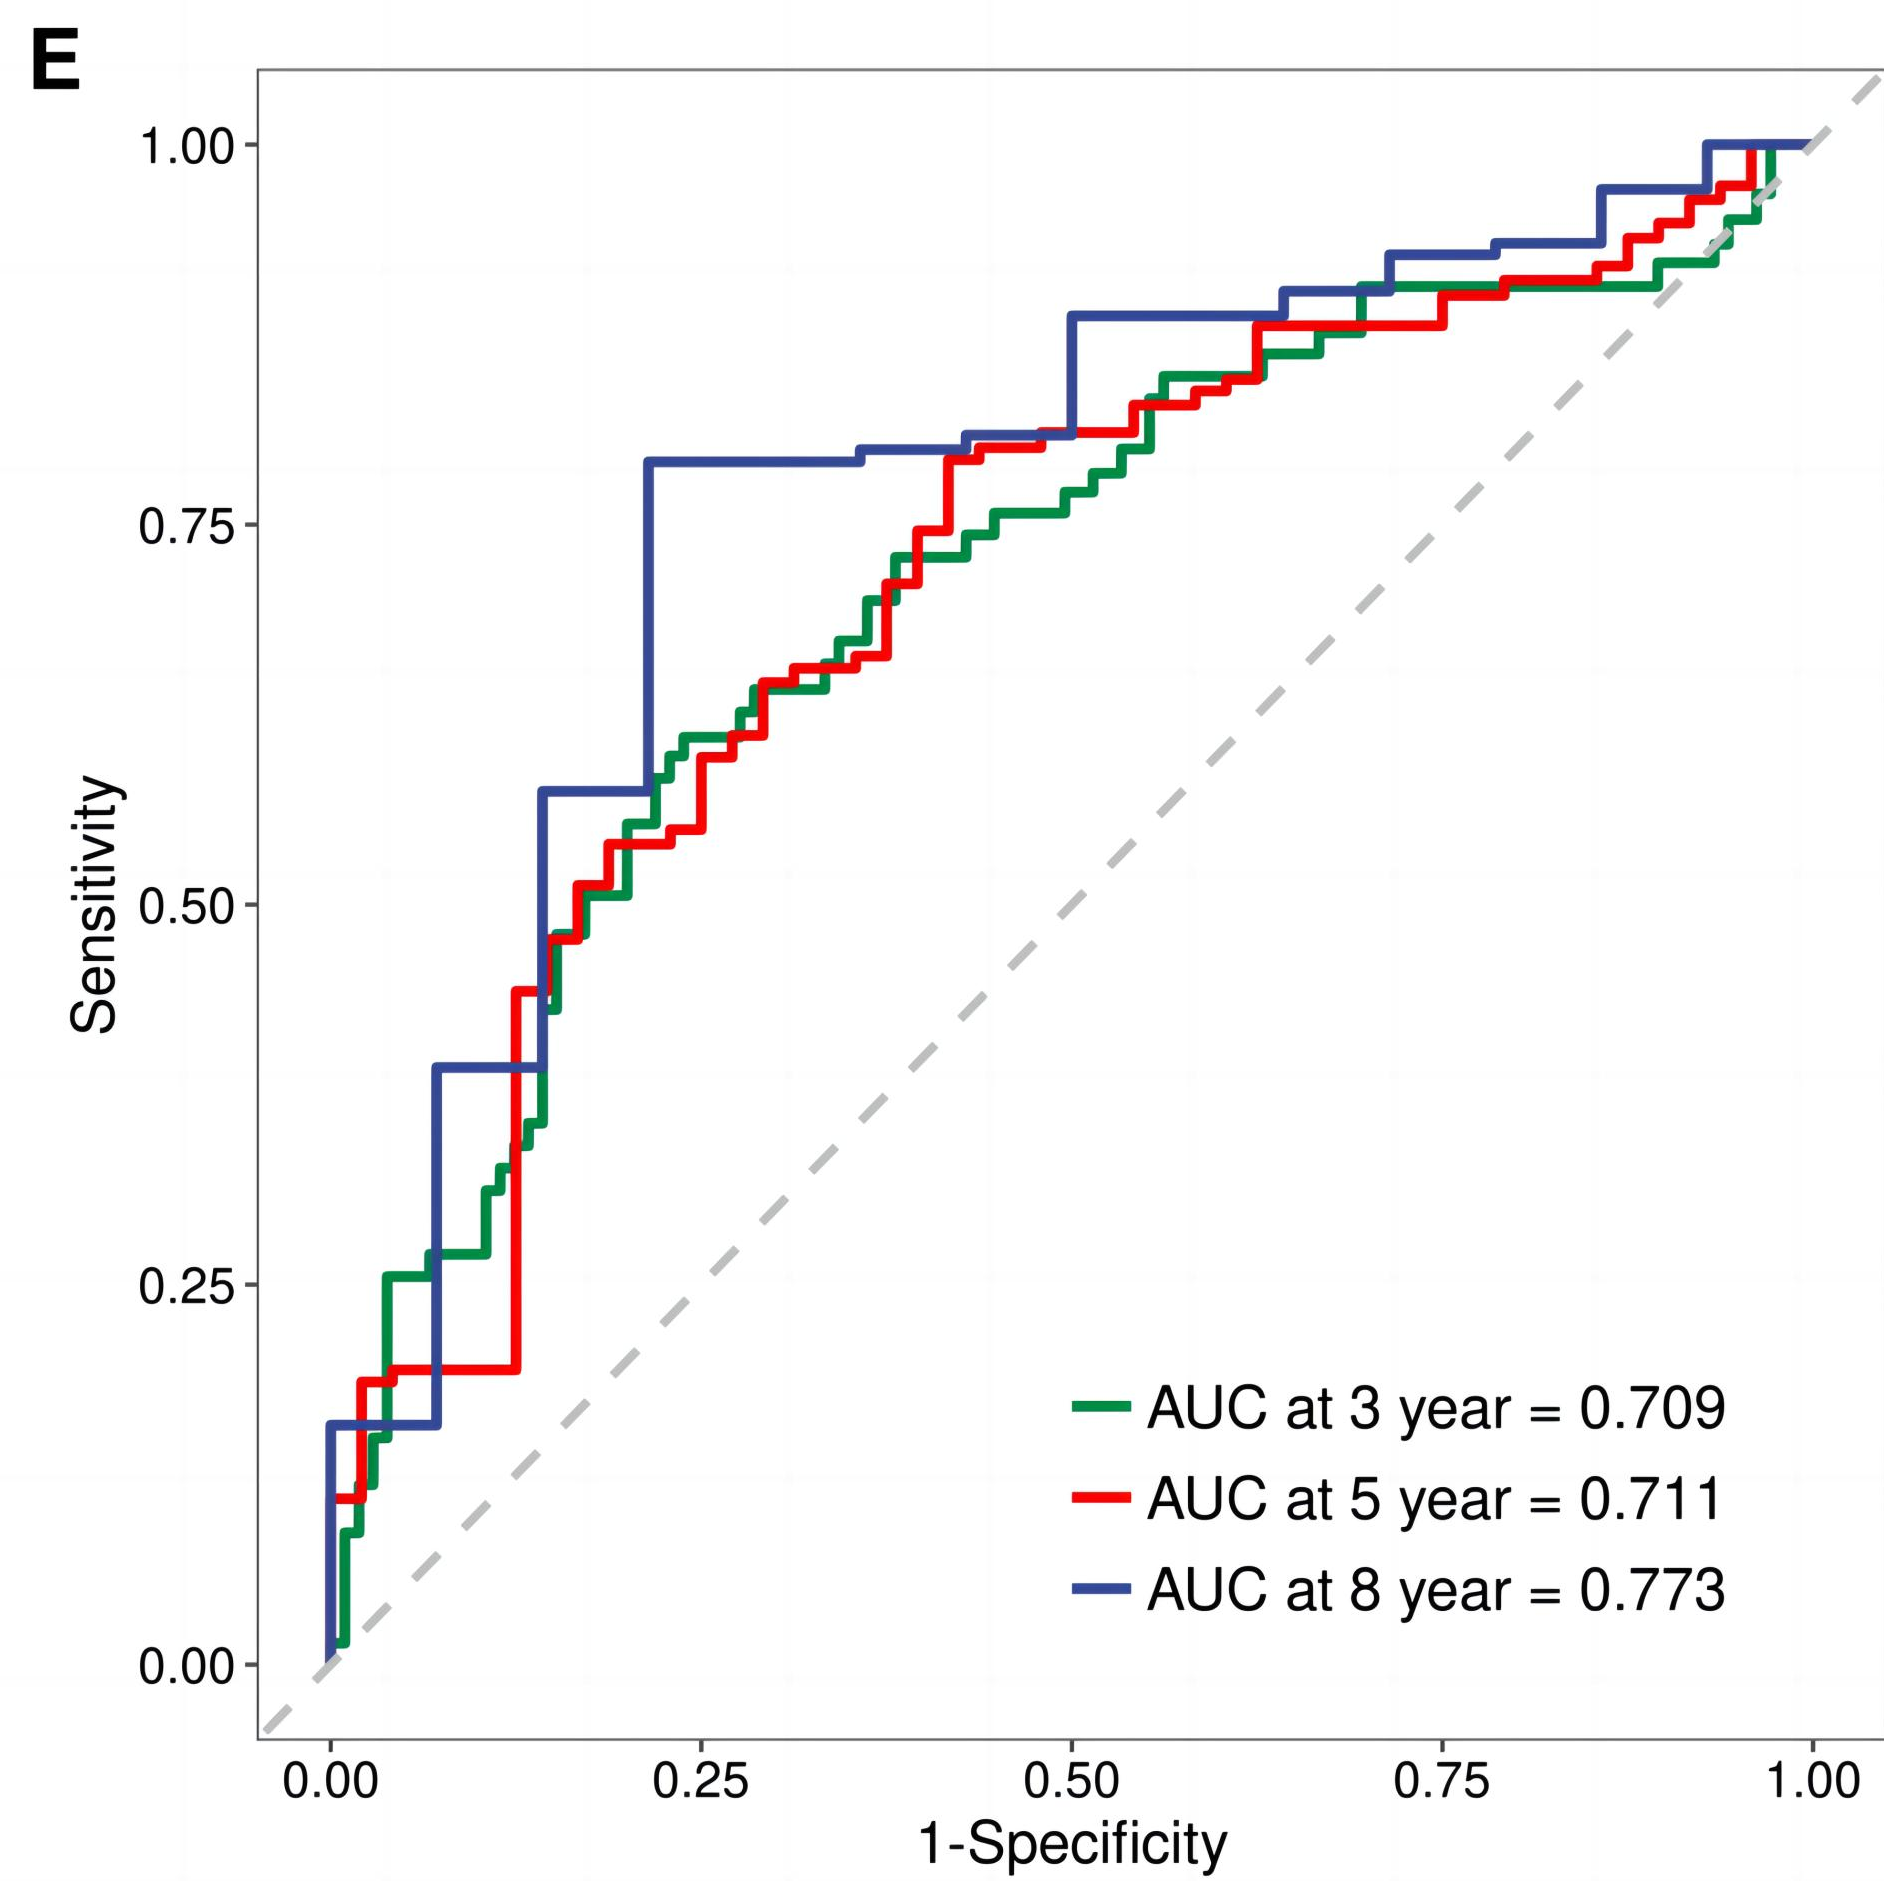

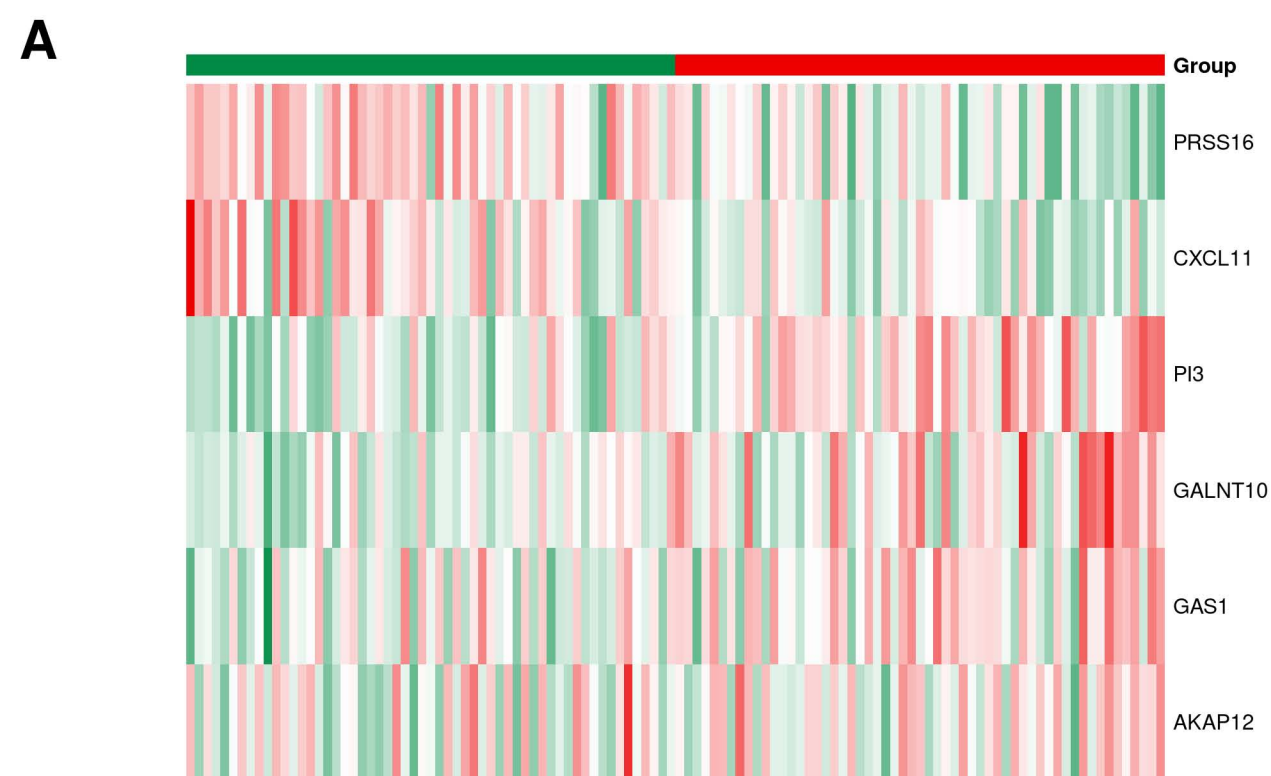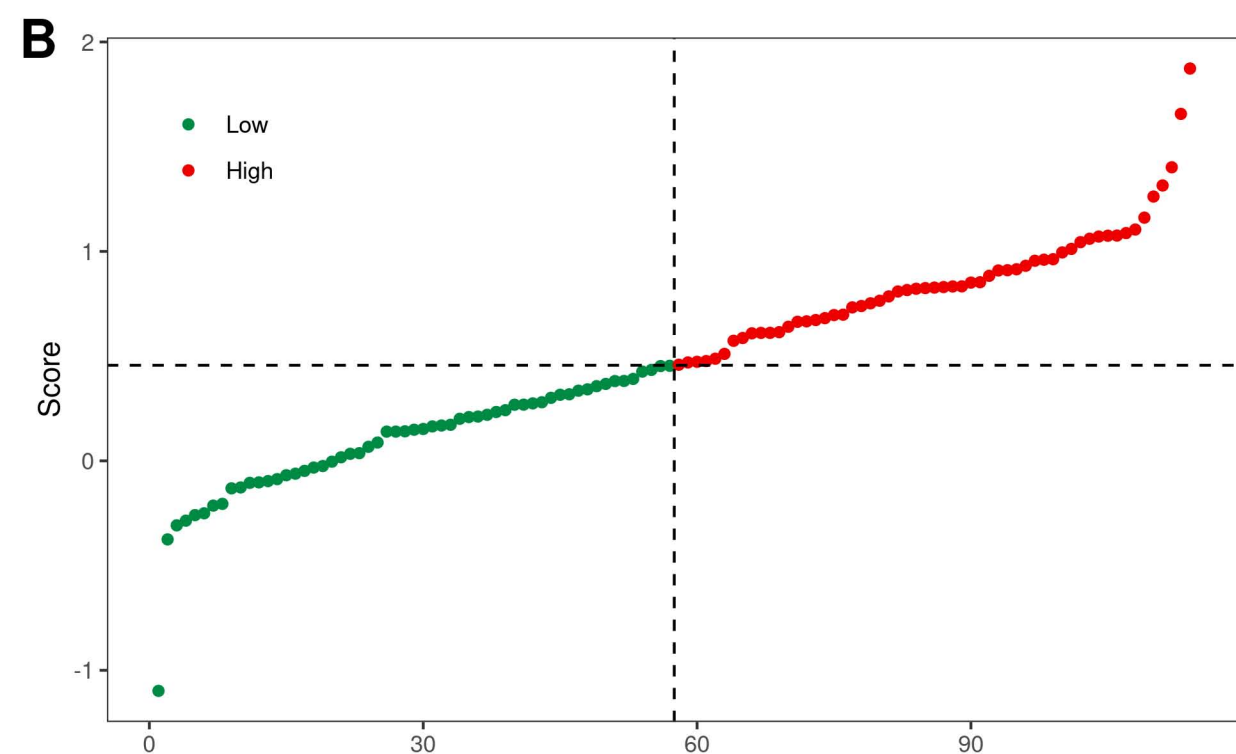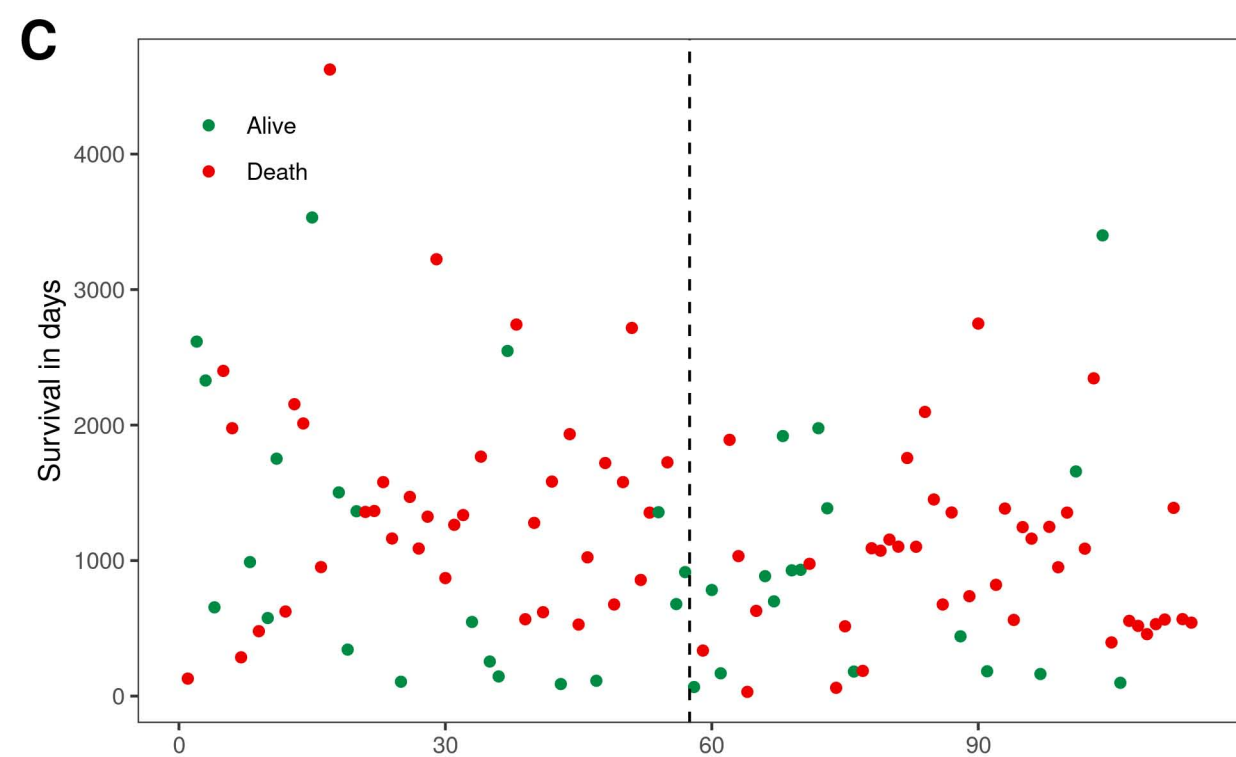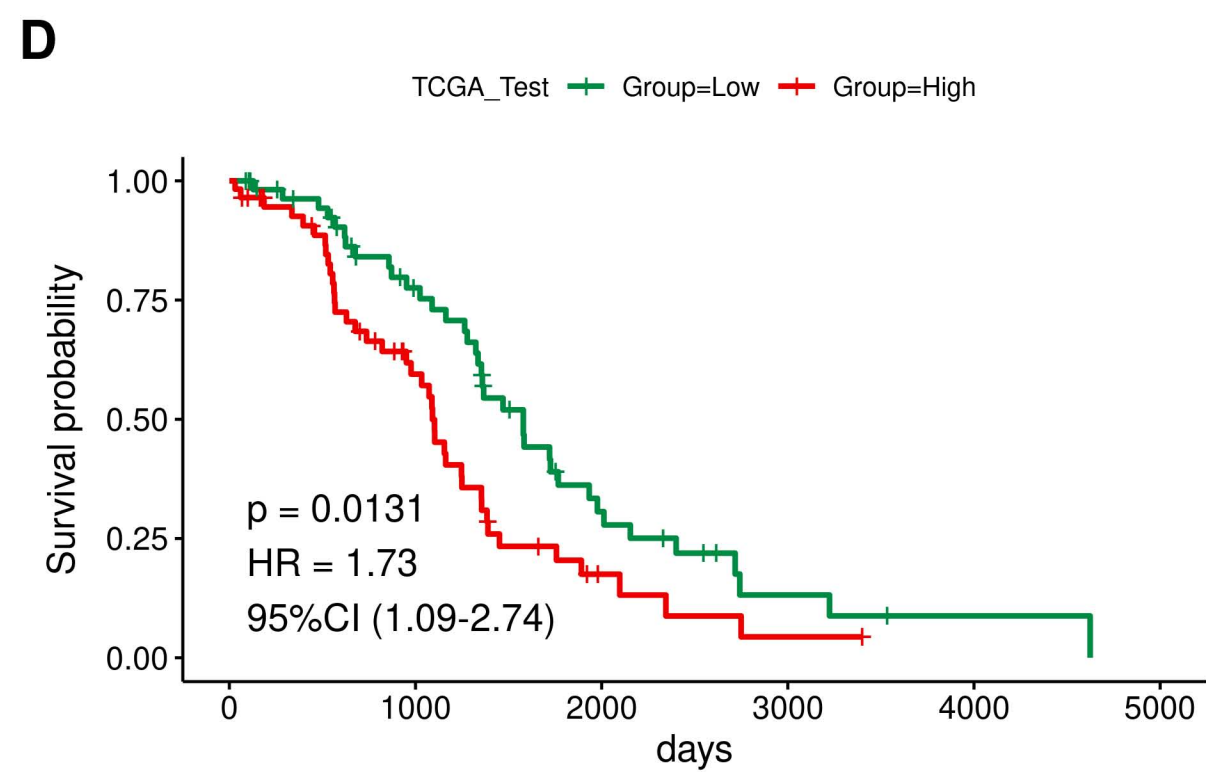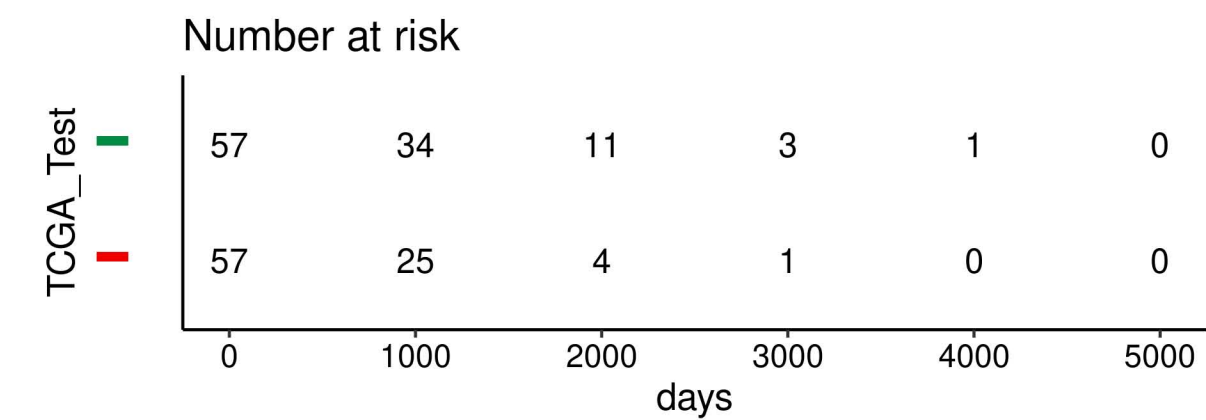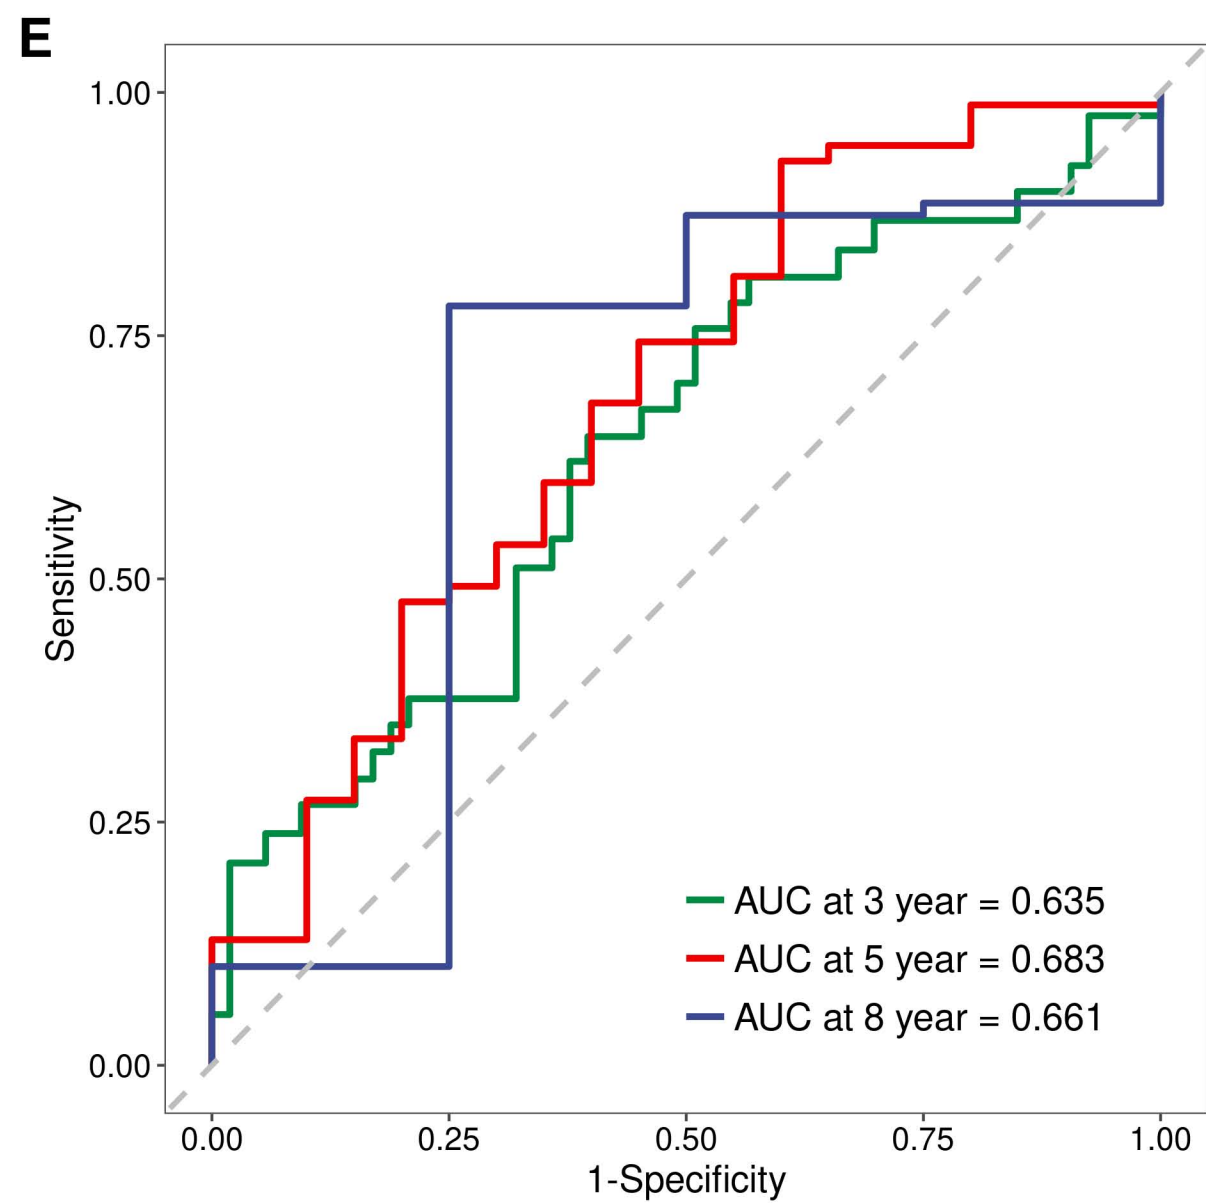

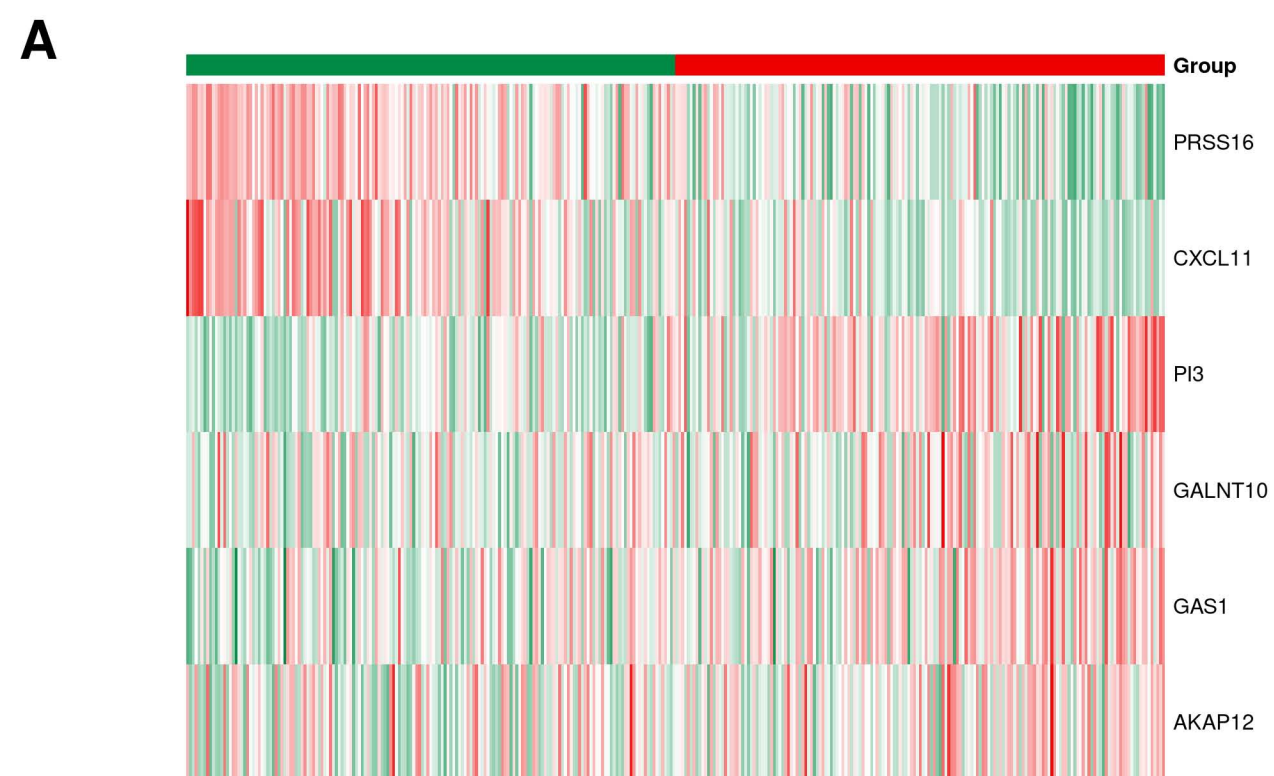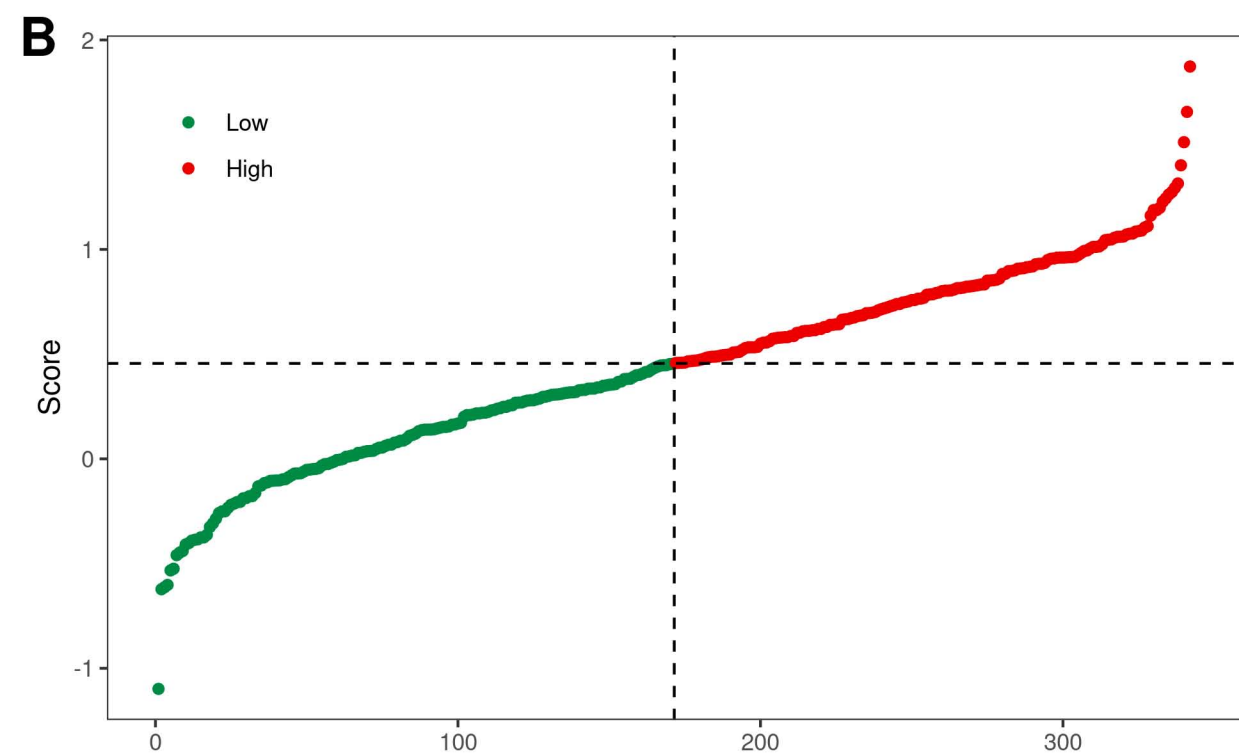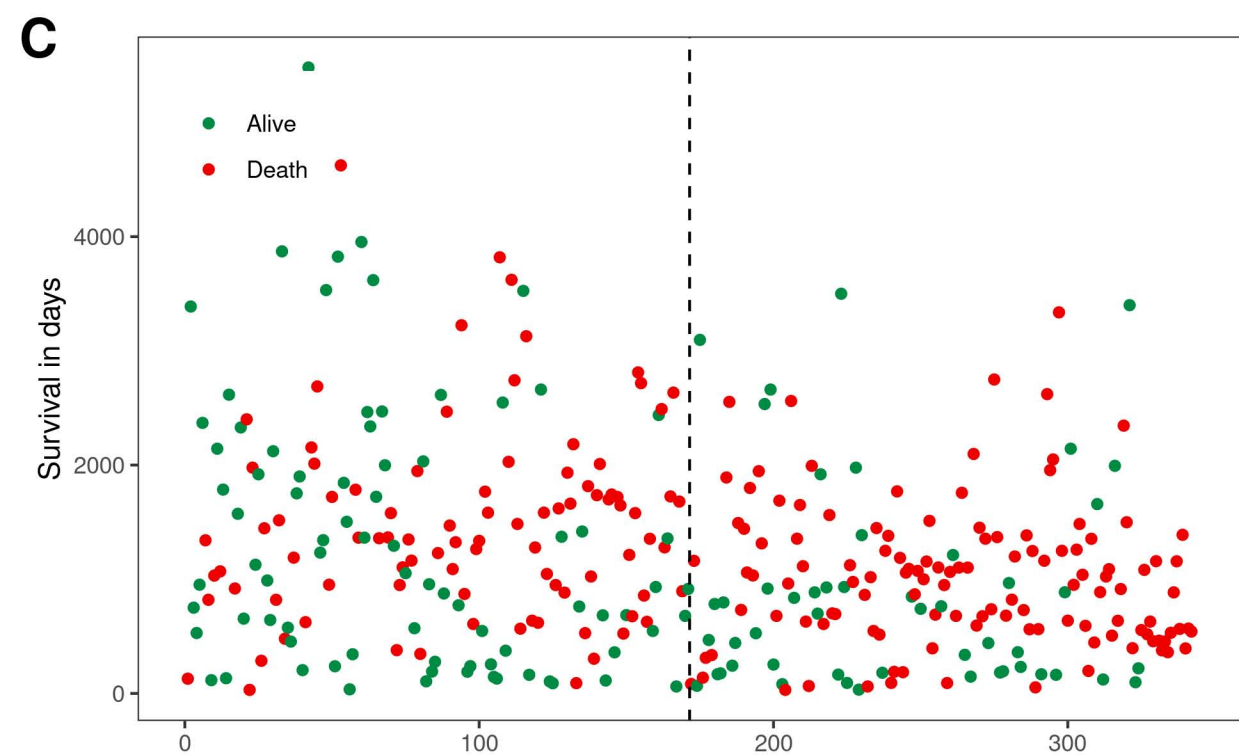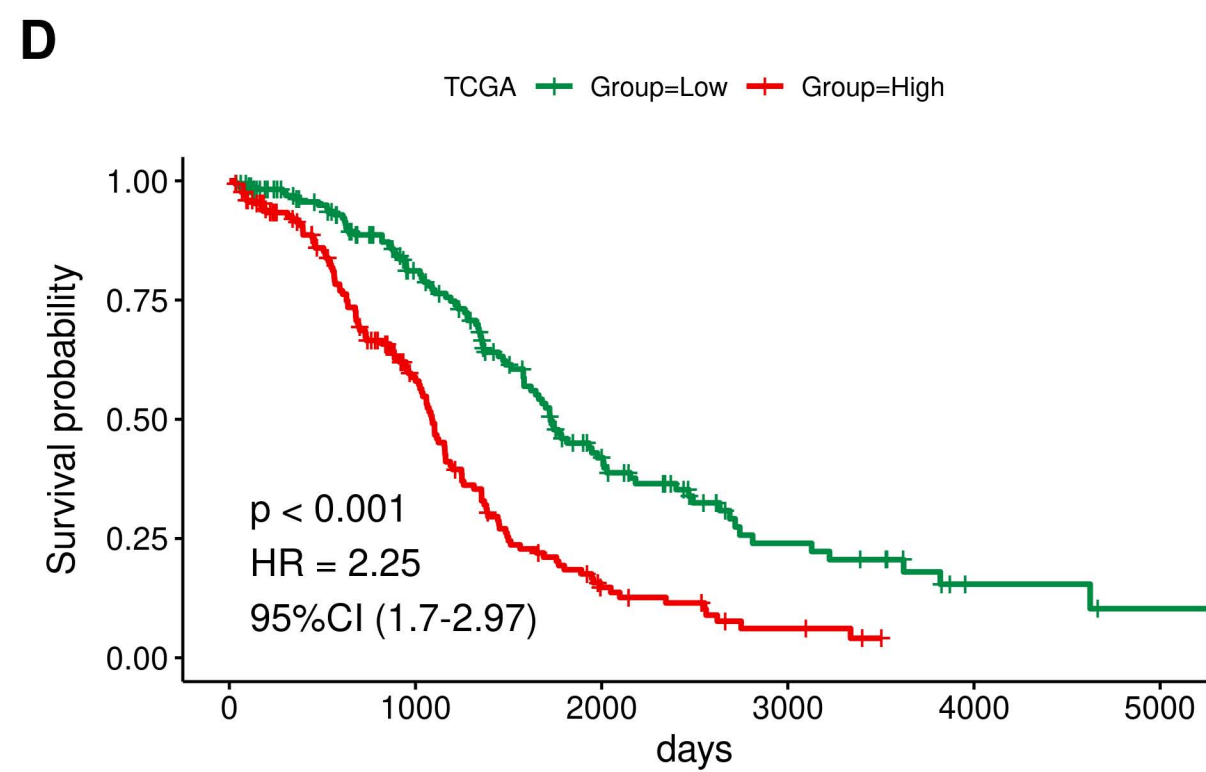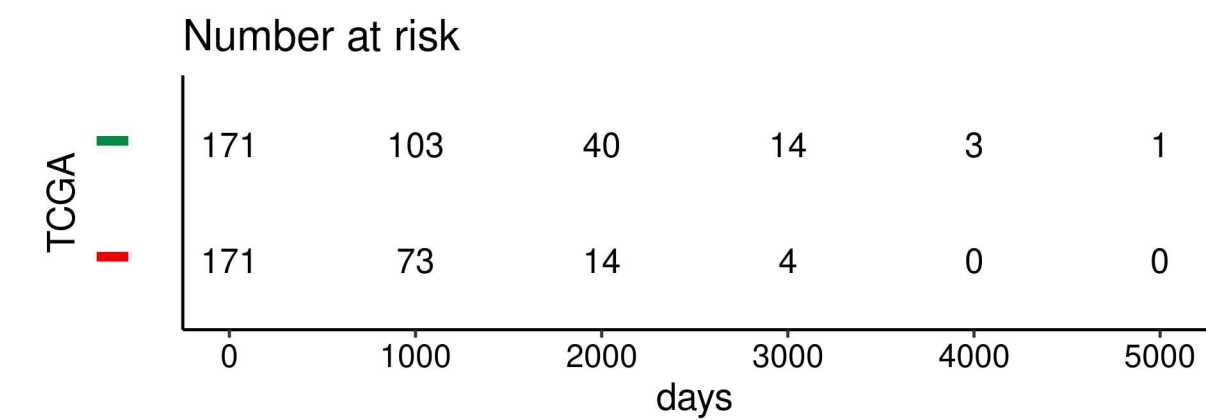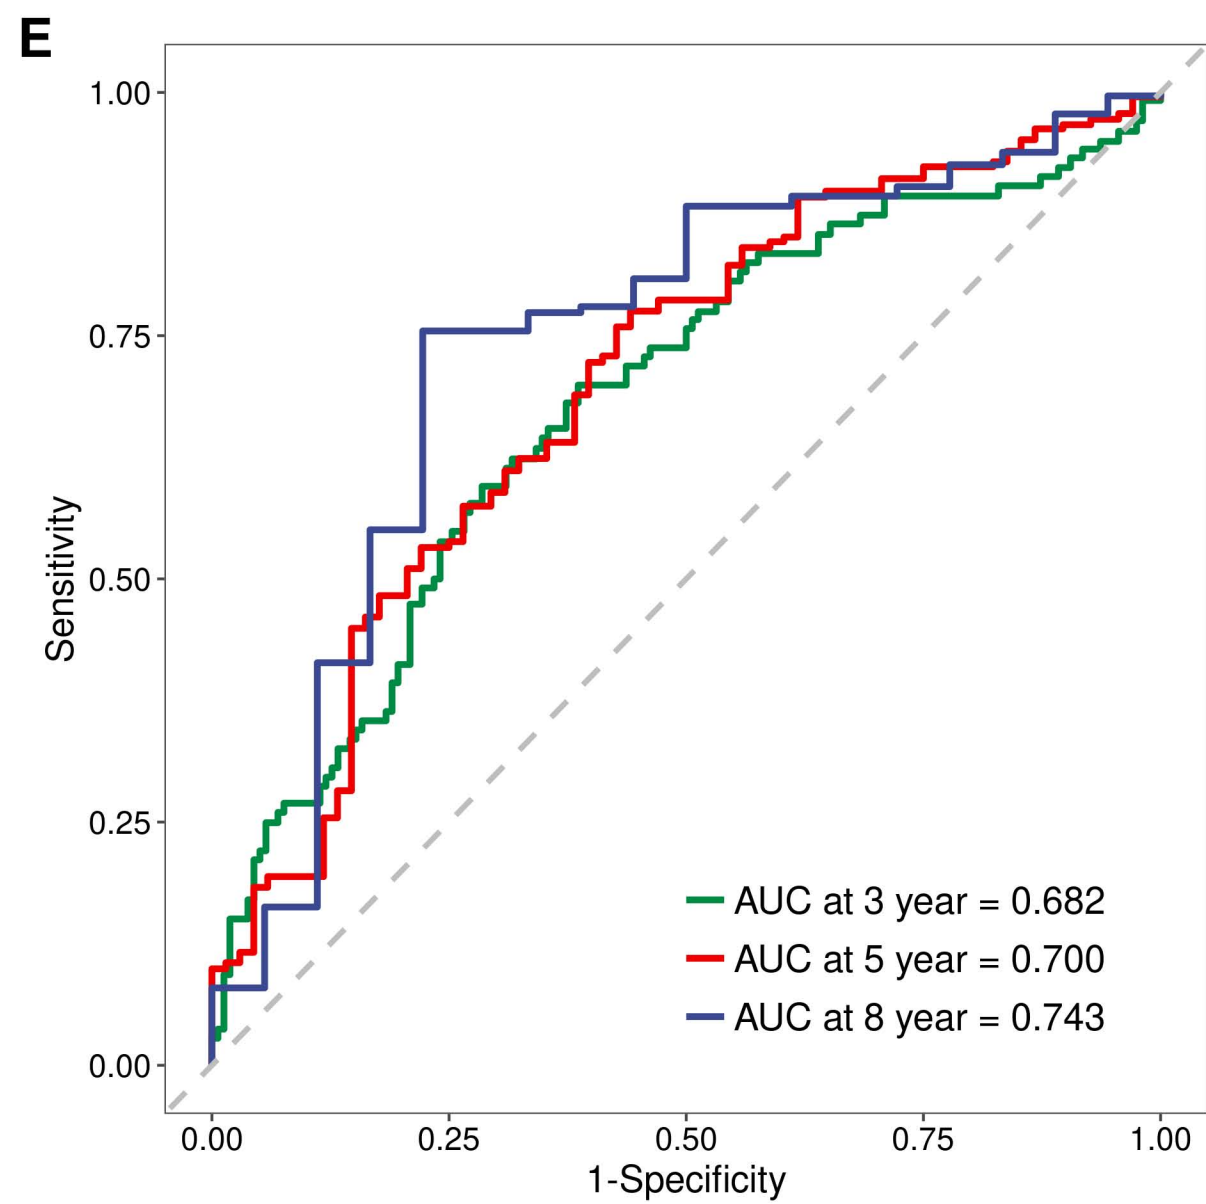

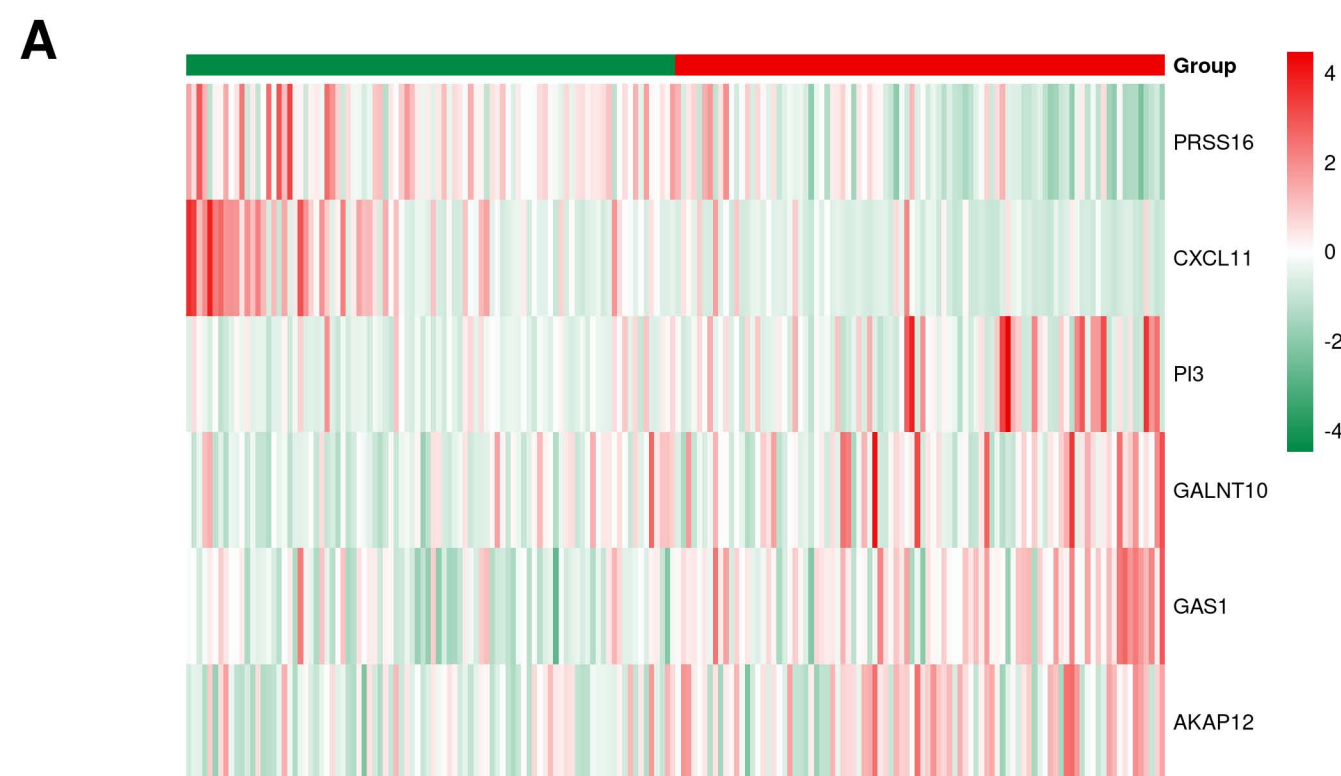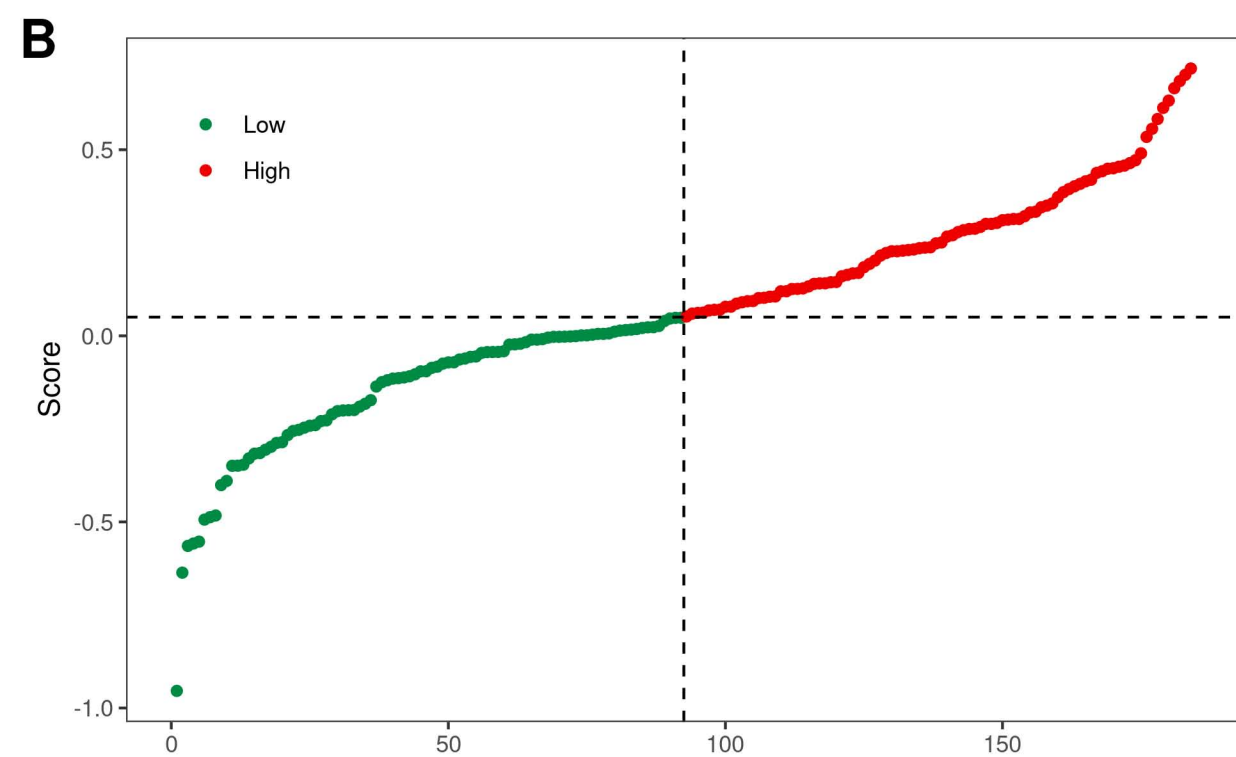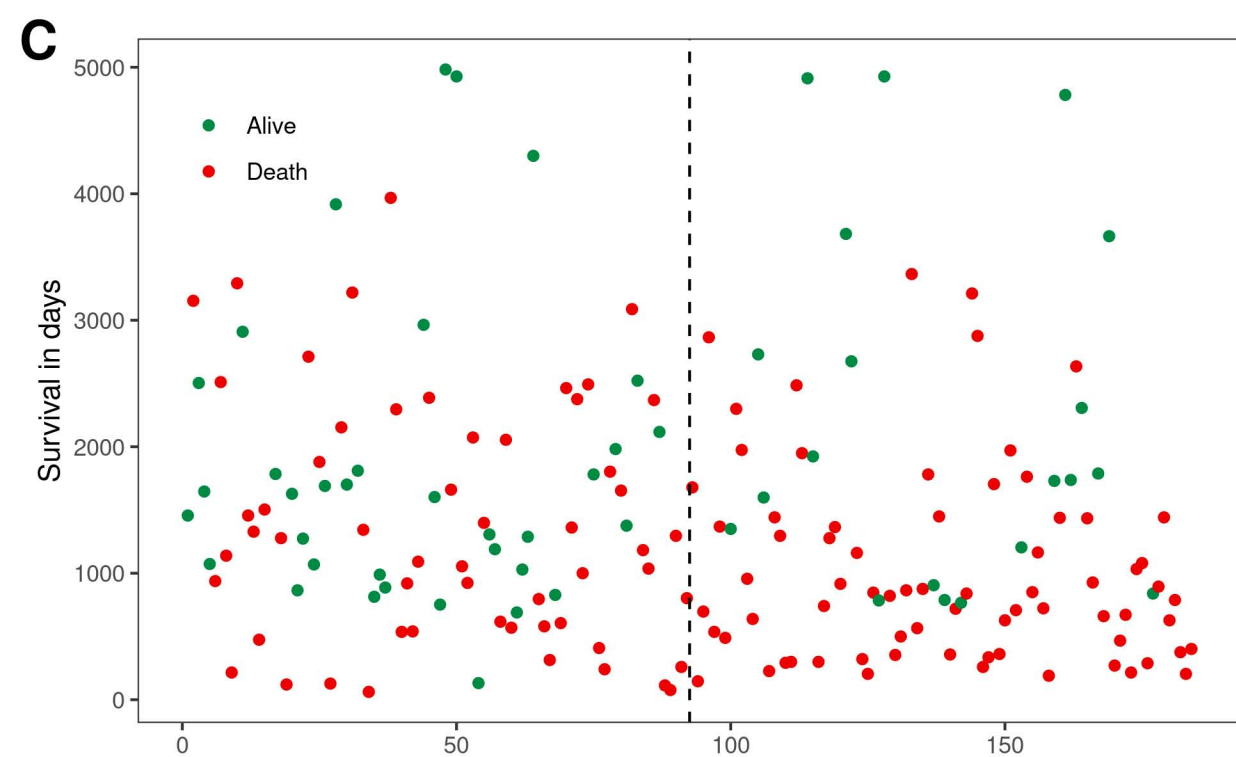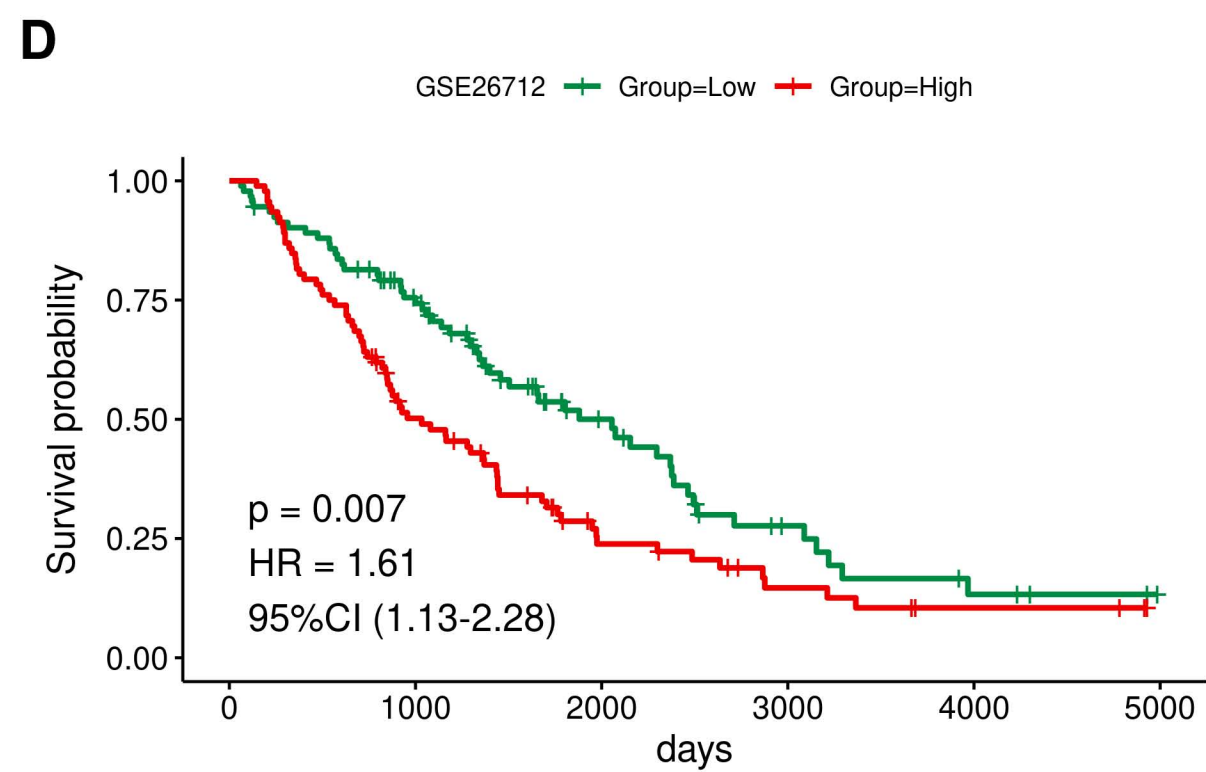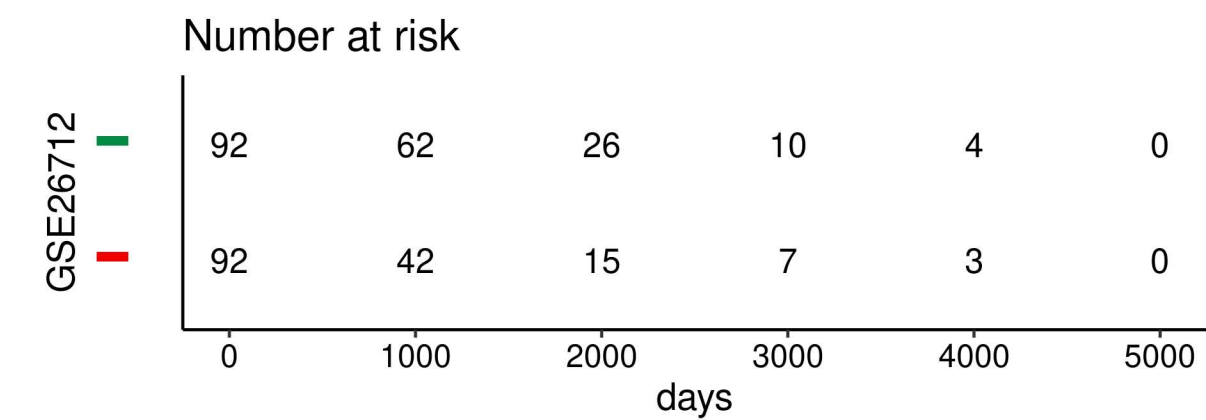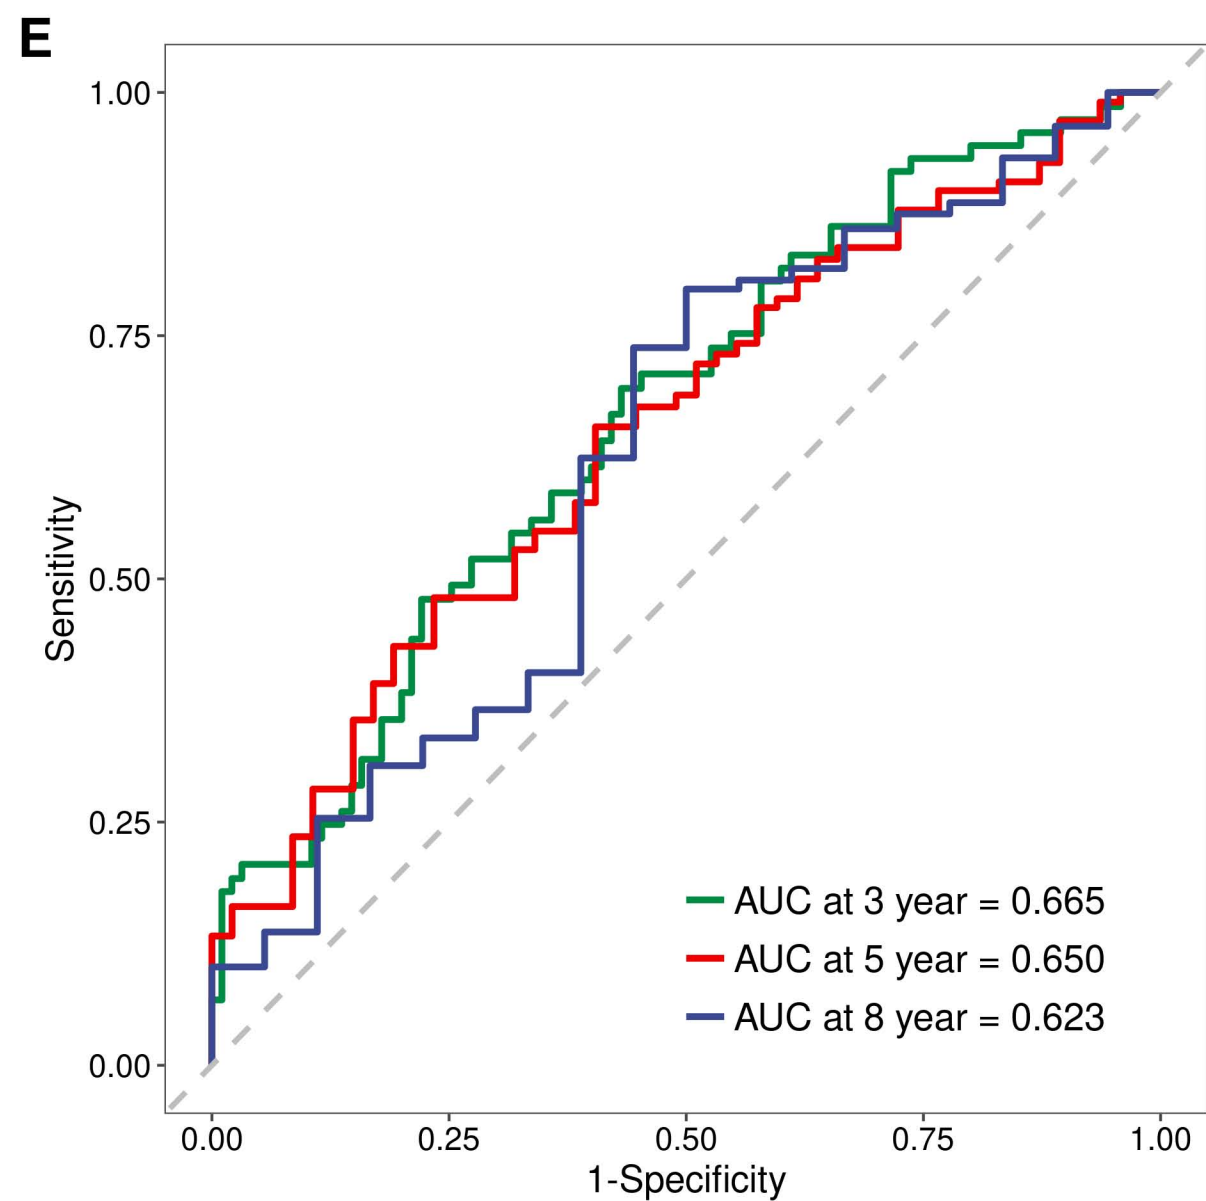

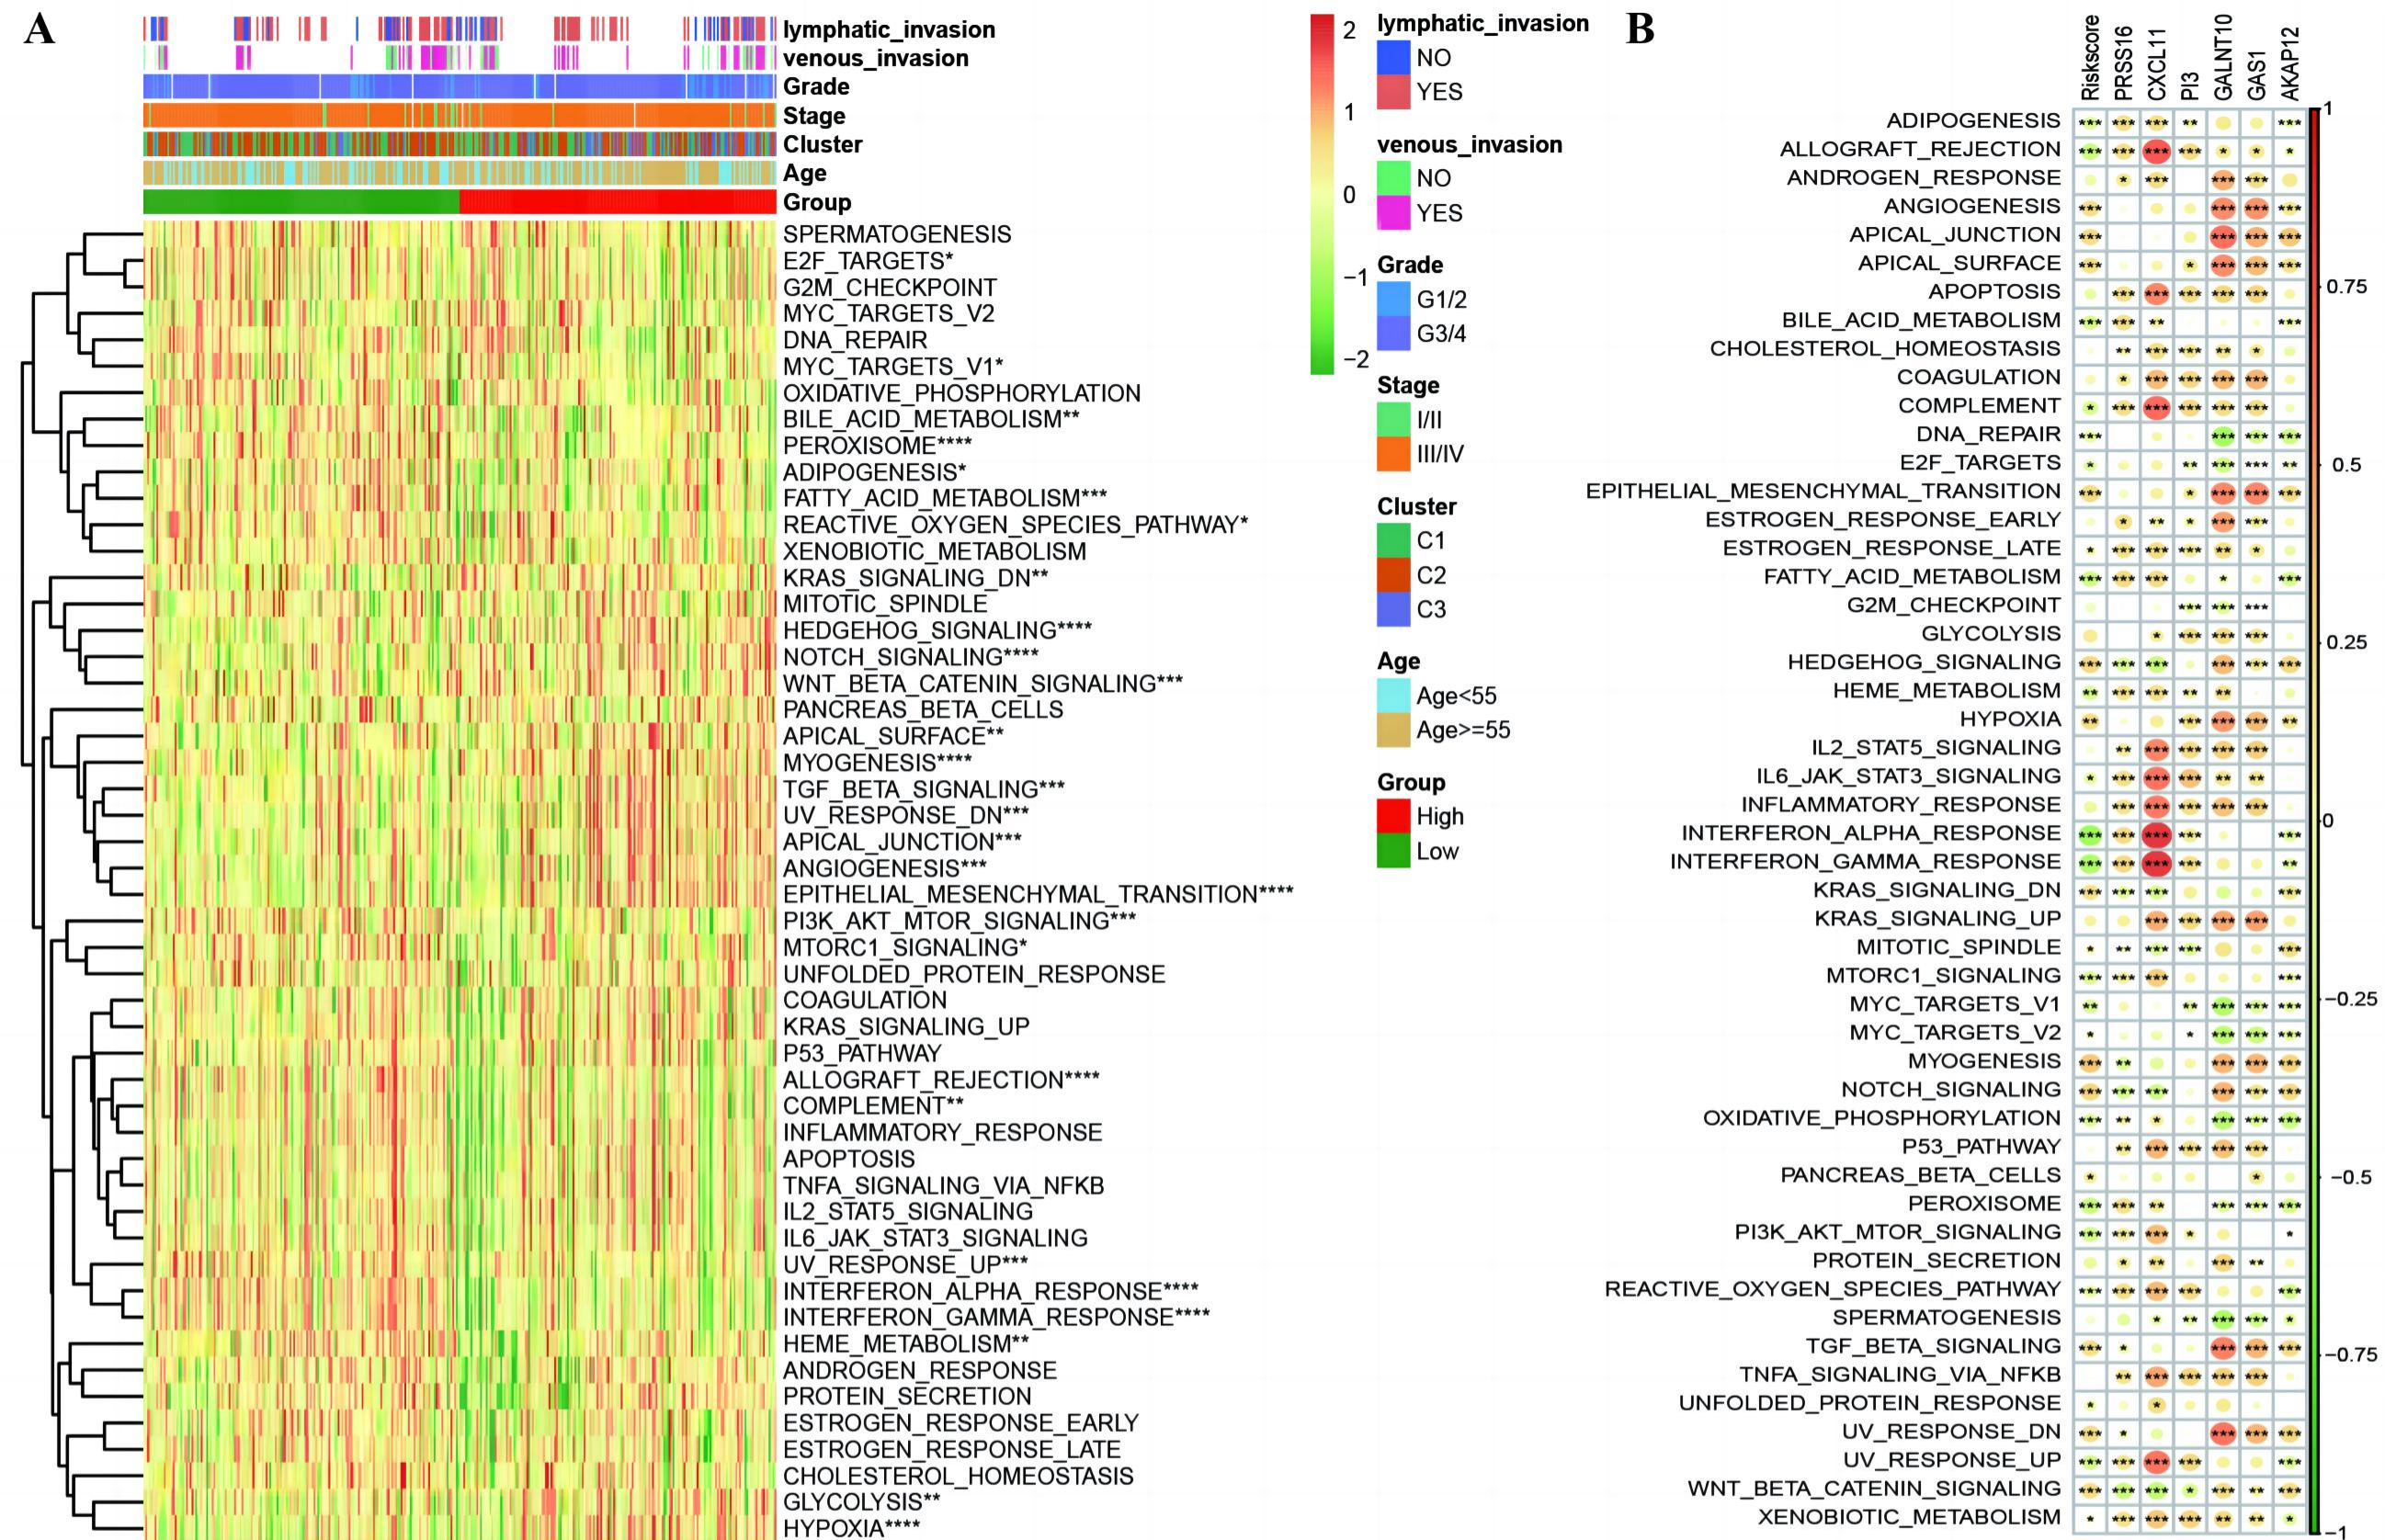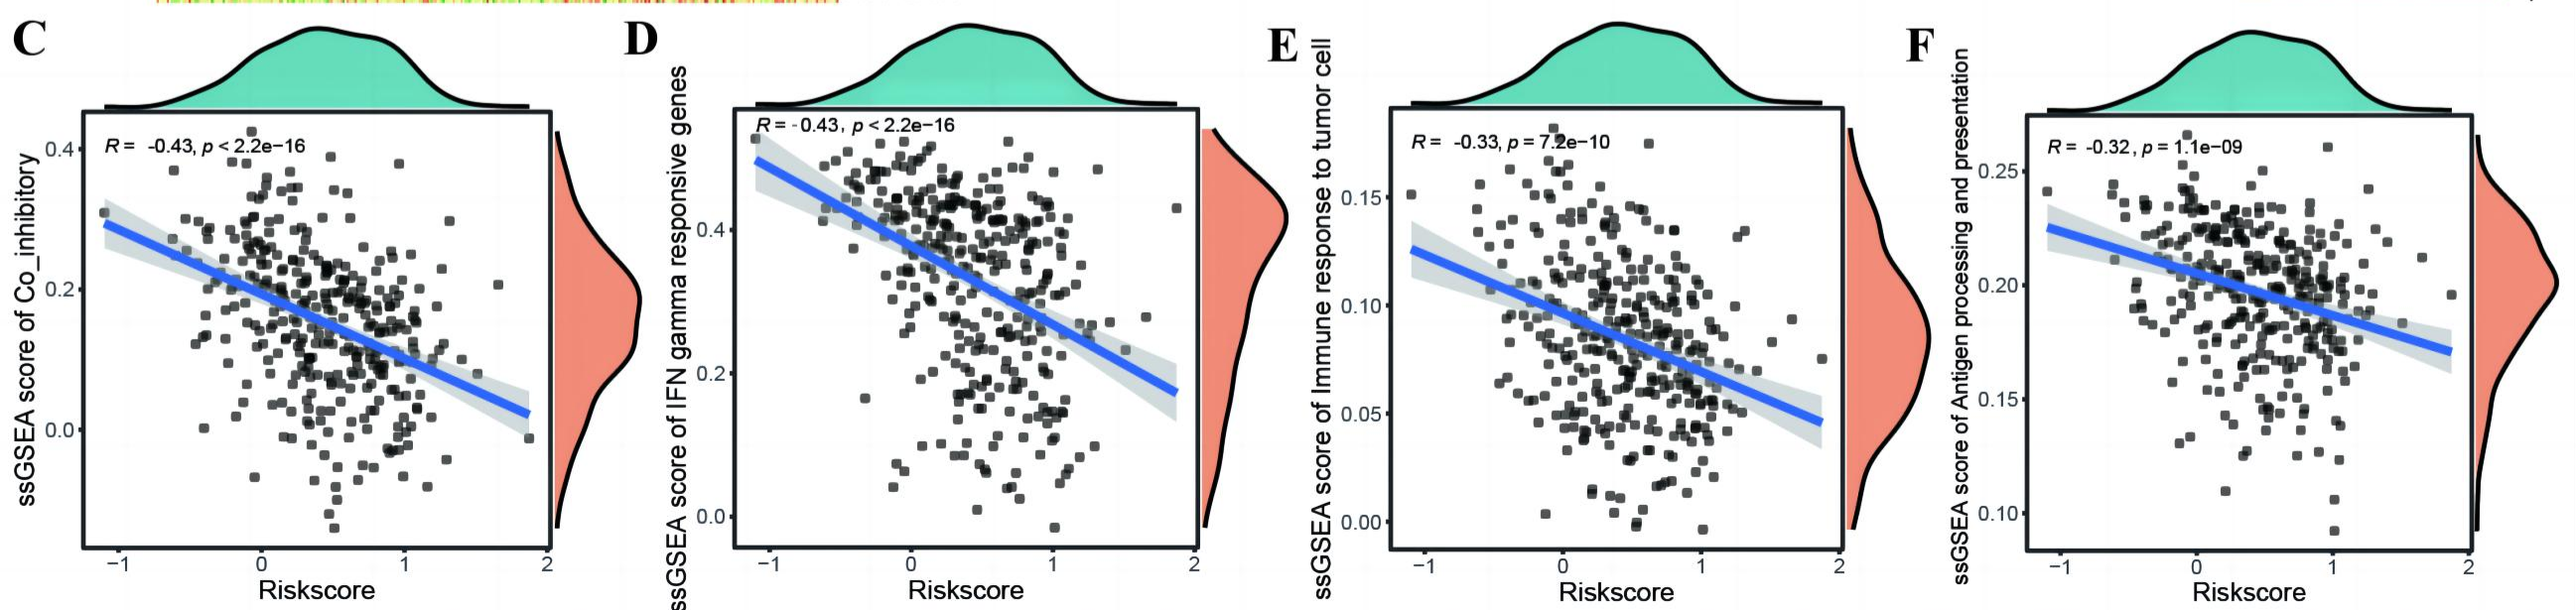

Supplement: Image1.pdf [file Image1.pdf]
